# Supplementary material for: Effect of Medication Optimization vs Cognitive Behavioral Therapy Among US Veterans With Chronic Low Back Pain Receiving Long-term Opioid Therapy: A Randomized Clinical Trial
Source: PubMed Central journal article supplement (PMC9672973; doi:10.1001/jamanetworkopen.2022.42533), 2022-11-17
Supplement: jamanetwopen-e2242533-s001.pdf [file jamanetwopen-e2242533-s001.pdf]

# CAMEO PROTOCOL

## A. RESEARCH OBJECTIVES

Chronic pain is a major public health problem. More than 70 million Americans suffer from chronic pain and 50 million of them are disabled by pain.<sup>1</sup> Chronic pain affects 40%-70% of veterans<sup>2</sup> and is a leading cause of disability, resulting in substantial negative impact on millions of veterans' lives.<sup>2</sup> Chronic pain is frequently accompanied by psychiatric comorbidity that adds to patient suffering and complicates treatment.<sup>3</sup> Chronic pain costs more than \$100 billion per year in medical expenses, lost wages due to disability, and other costs.<sup>4</sup> Musculoskeletal pain is especially common, accounting for two-thirds of all primary care visits for pain,<sup>5</sup> and chronic low back pain (CLBP) is the most prevalent, disabling, and costly.

Many options are available to treat CLBP, yet management is difficult because of the lack of consensus to guide clinician decisions. Analgesic medications remain the first line of treatment, but providers often do not use the entire array of analgesics that have been shown in clinical trials to be efficacious for CLBP. For non-pharmacological treatments, the strongest trial evidence is for those which use cognitive or behavioral approaches. Despite this evidence, primary care settings have not routinely implemented non-pharmacological treatments for CLBP because of time constraints, lack of provider knowledge, and limited personnel to deliver non-pharmacological treatments. However, the recent integration of psychologists into VA primary care settings increases the feasibility of administering non-pharmacological interventions. While multidisciplinary pain clinics produce the best outcomes using both pharmacological and non-pharmacological treatments,<sup>6</sup> the availability of such clinics is limited. Even if more referral services were available, the enormous burden of CLBP among veterans requires that most management still needs to occur in the primary care setting.

Use of opioid analgesics has increased both outside and within the VA for many pain conditions, including CLBP. While some pain experts view this trend as evidence of improved pain treatment, others have equated this practice to "flying blind,"<sup>7</sup> given the paucity of trials evaluating the effectiveness and safety of opioids. Many patients continue to experience severe, disabling pain despite opioid treatment; others report intolerable side effects from opioids. Primary care providers often struggle with opioid treatment decisions and worry about fostering prescription drug abuse and addiction. Given these controversies, struggles, and lack of convincing data for opioid use, research to compare pharmacological and non-pharmacological treatments to improve the management of CLBP, especially for veterans on long-term opioid therapy, is urgently needed.

Our long-term research objective is to develop, test, and implement novel treatments and care delivery models that address barriers to effective pain management and that can be practicably applied in VA primary care settings. The **C**Are Management for the **E**ffective use of **O**pioids (**CAMEO**) trial is a 2-arm randomized clinical trial to compare the effectiveness of pharmacological vs. behavioral approaches for CLBP.

Our study sample will include 300 veterans with moderate to severe CLBP despite long-term opioid therapy. Patients from five primary care clinics at the Roudebush VA Medical Center and *three community based outpatient clinics* will be recruited to participate in CAMEO and randomized to one of two treatment arms. The pharmacological arm will involve guideline-concordant opioid management coupled with algorithm-based co-analgesic treatment (**PHARM**). Patients in the behavioral arm (**BEH**) will receive pain self-management/coping skills training. The trial will last 12-months and all participants will undergo comprehensive outcome assessments at baseline, 3, 6, 9, and 12 months.

**Study Aims:** Among veterans with chronic low back pain refractory to long-term opioid therapy

- 1) **To compare the interventions' (PHARM vs. BEH) effects on pain intensity and function at 6 months (primary end point) and 12 months (sustained effect)**
- 2) **To compare the interventions' effects (PHARM vs. BEH) on other relevant outcomes**
  - Patient global impression of change
  - Health-related quality of life
  - Opioid dose
- 3) **To compare the cost-effectiveness of the interventions**

The trial is powered to detect a clinically significant between-group treatment effect. In addition to determining whether there is differential clinical effectiveness between the two types of treatments, the relative cost-effectiveness of the interventions will be determined. Because of clinical equipoise, it is not clear which

51 treatment approach will produce the most meaningful differences in outcomes. Therefore, the null hypothesis  
52 of no clinically significant difference between the two active treatment arms would be satisfied given a  
53 treatment effect size < 0.3 standard deviation. We expect both active treatment arms to significantly improve  
54 pain intensity, function, and other relevant outcomes at 6 and 12-months compared to baseline.

## 55 **B. BACKGROUND**

### 56 **B1. Chronic pain is a common, costly, and frequent cause of morbidity**

57 Pain is the most common physical symptom reported in both the general population and in primary care,<sup>8,9</sup>  
58 accounting for one-fifth of all clinic visits – over 100 million outpatient visits in the U.S. each year.<sup>5</sup> Further, pain  
59 takes an enormous toll on the US economy, with lost productive time from common pain conditions costing an  
60 estimated \$61.2 billion per year.<sup>10</sup> An estimated 1.3 billion person-days of work lost each year are due to back  
61 pain alone.<sup>11</sup> Pain adversely influences almost every aspect of a person's life and is frequently associated with  
62 depression and other psychiatric conditions. Studies have documented inadequate pain management in a  
63 variety of settings.<sup>12,13</sup> Notably, it has been estimated that 4 out of every 10 people with moderate to severe  
64 pain do not get adequate relief.<sup>14</sup>

### 65 **B2. Low back pain is the most prevalent, disabling, and costly pain condition**

66 Low back pain—the most common type of pain seen in primary care—ranks second only to the common cold  
67 as a reason for office visits.<sup>15</sup> In a systematic review of 56 studies examining the population prevalence for low  
68 back pain, the point prevalence ranged from 12% to 33%, 1-year prevalence ranged from 22% to 65%, and  
69 lifetime prevalence ranged from 11% to 84%.<sup>16</sup> Low back pain remains a leading cause of worker disability in  
70 the U.S., with costs of over \$400 million in compensation claims alone. The direct medical costs and costs of  
71 lost productivity from low back pain are estimated at \$25 billion and \$28 billion per year, respectively.<sup>17</sup>  
72 Factors associated with the development of chronic disability due to low back pain include psychological  
73 distress, presence of other types of chronic pain, job dissatisfaction or stress, and disputes over compensation.

### 74 **B3. Challenges to implement effective treatments for chronic low back pain in primary care**

75 Recent guidelines highlight the wide range of treatment options for the management of chronic low back  
76 pain.<sup>18,19</sup> Therapies that have proven efficacy in CLBP include simple analgesics (NSAIDs), tricyclic  
77 antidepressants, exercise therapy, and psychological therapies. Medications are the most common treatment,  
78 but often provide suboptimal pain relief when used as mono-therapy. Trial evidence for non-pharmacological  
79 treatments is strongest for those using cognitive or behavioral approaches.<sup>20,21</sup> For example, pain self-  
80 management programs have proven efficacious in trials of low back pain.<sup>22</sup> Despite this evidence, primary care  
81 settings have not routinely implemented non-pharmacological treatments for CLBP. Barriers to implementation  
82 are largely administrative and systemic and include time constraints, lack of knowledge in behavioral and self-  
83 management strategies, and limited availability of specialists to deliver behavioral treatments.

### 84 **B4. Prescription opioid use and abuse are rising in parallel with each other**

85 In the last 20 years, opioid therapy has expanded beyond cancer pain into widespread use for all types of  
86 moderate to severe acute and chronic non-cancer pain. Despite evidence gaps, primary care providers (PCPs)  
87 are prescribing opioids with greater frequency.<sup>23</sup> Between 1990 and 1996 the medical use of the opioids  
88 fentanyl, morphine, and oxycodone increased 1168%, 59%, and 23%, respectively.<sup>24</sup> More recently, Zerzan et  
89 al.<sup>25</sup> found that opioid use increased 309% in a 7-year period and that dispensing of opioids in Medicaid  
90 programs increased at almost twice the rate of non-pain related medications. According to our hospital's  
91 pharmacy leadership, RVAMC prescribes more opioids than any other VA Medical Center. Data shows that  
92 there were over 67,000 prescriptions for opioids in FY 2009, equating to a total pharmacy cost of \$3.2 million

93 While opioid prescriptions are rising, abuse (i.e., use of an opioid in a manner other than how it is indicated or  
94 prescribed) is escalating at a commensurate rate.<sup>26</sup> Abuse of prescription opioids rose 71% between 1997 and  
95 2002,<sup>27</sup> and a single-site VA study found that 24% of patients receiving opioids had misuse documented in  
96 their charts.<sup>26</sup> More alarmingly, recent reports indicate that opioid-related deaths are also on the rise.<sup>28</sup>  
97 Between 1999 and 2004, deaths from methadone poisoning rose 390%, compared to 54% for drugs overall.<sup>29</sup>

### 98 **B5. The safe and effective use of opioids in primary care is challenging**

99 PCPs manage the vast majority of patients with chronic pain, yet many have received little training in pain or  
100 addiction medicine. Further, PCPs face a dearth of evidence to guide prescribing and monitoring, and lack

resources and system supports to facilitate high quality pain and opioid management.<sup>30</sup> PCPs are often not well-versed in the nuances of using opioids, or in tools such as treatment agreements (“contracts”) and urine drug tests to monitor misuse (i.e. use of opioids in a manner other than indicated or prescribed).

Currently, most primary care settings are not equipped to facilitate a comprehensive evaluation of patients with chronic pain for treatment response, side effects, adherence, and misuse.<sup>31</sup> Time constraints, limited resources, and competing demands may interfere with the effective pain management. Dobscha et al.<sup>32</sup> found that three-quarters of VA PCPs viewed treating chronic pain as a “major” source of frustration, largely because of perceived inability to offer optimal treatments and their view that system support is inadequate for managing the complexities of chronic pain (i.e., disability and associated psychiatric disorders). We conducted PCP interviews here at RVAMC that corroborate Dobscha’s findings.<sup>33</sup> PCPs often face the dilemma of balancing the pain-relief potential of opioids for patients who need them against the reality that some may misuse them.

#### **B6. Other treatment options are needed in primary care when opioids fail to relieve veterans’ pain**

While opioids have substantially and safely improved the quality of life for many patients disabled by pain,<sup>34</sup> their long-term use remains controversial for several reasons. First, the long-term efficacy of opioids is unclear, especially for CLBP.<sup>35</sup> Second, opioids are associated with problematic side effects such as constipation, sedation, nausea, dry mouth, and itching. Third, opioids may lead to adverse physiologic effects such as hyperalgesia<sup>36</sup> and hypogonadism<sup>37</sup> and have potential for misuse, which may occur more frequently than previously thought. Fourth, opioids provide significant relief for only a minority of patients.<sup>38</sup>

The lack of relief from opioids is frustrating to patients who may feel like they have exhausted all options in their pain treatment. This is also frustrating for PCPs concerned about opioid dose escalation and lack of additional treatment options. Guidelines and reviews<sup>6</sup> suggest that patients with refractory pain could benefit from multidisciplinary and multimodal pain treatment, but such intensive treatment is often not available. Patients and PCPs need additional treatment options, delivery models, or system supports that can be practicably applied in a busy VA primary care setting.

#### **B7. Care management holds promise as a delivery model to improve VA pain care**

Studies of nurse care management for pain appear promising as a care delivery model to support PCPs. Lamb et al.<sup>39</sup> found that a nurse-led case management program for methadone treatment improved safety and patient satisfaction. Our SCAMP (Stepped-Care for Affective Disorders and Musculoskeletal Pain) trial, published last year in *JAMA*,<sup>40</sup> tested a stepped care approach for primary care patients with comorbid depression and chronic musculoskeletal pain. All aspects of the intervention (antidepressants combined with a pain self-management program) were delivered by nurse care managers. At 12-months, the intervention showed large reductions in depression severity and moderate benefits for pain severity and function.<sup>40</sup>

The VA’s Patient Centered Medical Home Initiative and its focus on an interdisciplinary, team-based model of care delivery to facilitate partnerships among veterans, PCPs, and other health care professionals such as nurse care managers and clinical psychologists is relevant to chronic pain management in general and CAMEO specifically. By comparing two different interventions (pharmacological vs. behavioral) and delivery models (nurse care management vs. primary care-mental health integration) in CAMEO, findings will inform the evolution of VA’s Patient Centered Medical Home.

#### **B8. Non-pharmacological treatments have been shown to be effective for chronic pain**

For patients with chronic pain, self-management involves a combination of treatment adherence, behavioral change, adapting life roles, managing negative emotions, and coping skills. A systematic review by Newman et al.<sup>41</sup> found strong clinical trial evidence that self-management programs are effective for both low back pain and osteoarthritis, with possible secondary benefits in reducing psychological distress.<sup>22</sup> Furthermore, back pain outcomes may be more dependent on effective self-management than on other treatment approaches.<sup>42</sup> Lorig’s Arthritis Self-Management Program is the most commonly cited program and has consistently demonstrated effectiveness in improving and maintaining health outcomes and reducing health care utilization among patients with arthritis and various rheumatic conditions,<sup>43</sup> including low back pain.<sup>44</sup> The program focuses on improving perceived ability through action plans, feedback, emotional management, and problem solving strategies. It may be effectively administered by trained individuals in group or individual settings.

Cognitive-behavior therapy (CBT) is the most evidence-based psychological alternative to traditional medical approaches to CLBP management. Evidence from numerous trials supports CBT for a variety of pain

152 conditions,<sup>45</sup> including CLBP.<sup>20</sup> CBT for chronic pain is informed by social learning theory that hypothesizes  
153 that patients' idiosyncratic beliefs, attitudes, and coping resources play a central role in determining their  
154 experience of pain.<sup>46</sup> Accordingly, patients' maladaptive appraisals directly contribute to the persistence of  
155 back pain and pain-related disability. CBT for chronic low back pain has evolved as a coping skills education  
156 and training approach designed to promote the acquisition and sustained use of a range of adaptive behavioral  
157 (e.g., activity pacing, behavioral goal setting) and cognitive (e.g., cognitive reframing, mental relaxation) pain  
158 coping skills to promote a perspective of personal control and mastery related to the experience of chronic  
159 pain.

## 160 **B9. Our prior pain research that informs this CAMEO trial**

161 We have performed considerable preliminary work that informs this trial:

- 162 1) Pain as the 5<sup>th</sup> vital sign in veterans. We retrospectively compared opioid prescribing by PCPs before  
163 and after implementation of the "Pain as the 5<sup>th</sup> vital sign" and found that opioid prescriptions  
164 significantly increased after implementation. Furthermore, higher pain scores were significantly related  
165 to the likelihood of an opioid prescription, suggesting that PCPs tailored their analgesic prescribing to  
166 their patients' pain severity.
- 167 2) SCAMP trial – quantitative results. Our SCAMP trial (Kroenke, PI) which tested antidepressants  
168 combined with a pain self-management program delivered by nurse care managers, showed the  
169 intervention group (n = 123) experienced large improvements in depression severity (effect size = 1.1)  
170 as compared to usual care patients (n = 127) and moderate improvements in pain severity (effect size =  
171 0.5).<sup>40</sup> While the intervention was effective, the moderate decrease in pain suggests a need for  
172 improved analgesic management--a desire repeatedly expressed by SCAMP patients.
- 173 3) SCAMP trial – qualitative results. Focus groups (Bair, PI) of SCAMP participants (one-third veterans)  
174 identified support from the nurse care managers as one of the most beneficial aspects of the trial.<sup>47</sup>  
175 Further, in identifying barriers and facilitators to their use of pain self-management,<sup>48</sup> patient  
176 perspectives on opioids emerged, revealing that frustrations are felt by physicians and patients alike.  
177 (1) "To get medicine, to get pain medicine out of them is like fighting Mohammed Ali and Mike  
178 Tyson, you know...you have to be on your, practically on your deathbed to get a pain pill. And  
179 they don't understand that. They think I'm addicted. It's not that." (2) And, I felt like a druggie  
180 and, I mean, I woke up and I was like, "Oh, God."
- 181 4) Clinical reminders for veterans with severe pain. The CRAFT study (Bair, PI) a HSR&D funded project,  
182 revealed PCPs' challenges faced related to opioid prescribing. For example:  
183 (1) "They end up at the VA, and they have already been on narcotics for many years. You have  
184 a bad feeling about what is going on here, but by that point, it is kind of like the horse is out of  
185 the barn" (2) "I have several doctors in my clinic who I really feel like they spend one  
186 nanosecond in the room with the patient and write the narcotics and walk out. Because that is  
187 the easy way out. And, if you want to actually try to deal with it and deal with the complexities of  
188 it, that takes a lot of time. It takes a lot of attention, and too many doctors don't deal with it."
- 189 5) Opioid prescribing and renewals for veterans with chronic pain This pilot study (Krebs, PI)  
190 characterized practice gaps for therapeutic monitoring of long-term opioids in primary care. Chart  
191 reviews of 123 patients found: (1) 80% had an indication for opioids documented; (2) 84.5% had a pain  
192 assessment documented; (3) 30% had adherence assessed; (4) 21% had adverse effects assessed;  
193 (5) 15% had a urine drug screen within 12 months; and (6) 14% had an opioid agreement in the  
194 medical record. These findings suggest that current opioid monitoring practices fall well short of  
195 VA/DoD opioid therapy guidelines.<sup>49</sup>
- 196 6) ESCAPE Trial (Bair, PI)—The VA RR&D-funded ESCAPE trial is an ongoing RCT designed to test a  
197 stepped care intervention for OIF/OEF veterans with musculoskeletal pain of the spine (low back, neck)  
198 and extremities (legs, knees, hips, and shoulders). The intervention involves treatment with analgesics  
199 combined with pain self-management skills in step 1. Patients who do not improve at 3-months move  
200 on to step 2-- cognitive behavioral therapy. We started patient recruitment in January 2007 and plan to  
201 complete enrollment by September 2010.



7) Other current VA pain research among our CAMEO team. Dr. Krebs has a VA HSR&D CDA which focuses on improving opioid prescribing in veterans with chronic pain.

**Table 1** below summarizes how CAMEO differs from our completed SCAMP trial and ongoing ESCAPE and SCOPE trials. (Key information and differences in trial characteristics are **bolded**)

| <b>Table 1. Comparisons across proposed, completed, and ongoing trials</b> |                                          |                              |                                     |                               |
|----------------------------------------------------------------------------|------------------------------------------|------------------------------|-------------------------------------|-------------------------------|
| Characteristics                                                            | <b>CAMEO</b>                             | <b>SCAMP</b>                 | <b>ESCAPE</b>                       | <b>SCOPE</b>                  |
| Status                                                                     | Proposed (6/10)                          | <b>Completed</b>             | Active until (9/10)                 | Started (10/09)               |
| Patients, N                                                                | <b>300</b>                               | 250                          | 240                                 | 250                           |
| % Veterans                                                                 | 100%                                     | 40%                          | <b>100% OIF/OEF</b>                 | 100%                          |
| Clinic setting                                                             | Primary care                             | Primary care                 | <b>Post-deployment Primary Care</b> | Primary care                  |
| Study site(s)                                                              | RVAMC<br><b>23CBOCs*</b>                 | Indiana Univ. and RVAMC      | RVAMC                               | RVAMC                         |
| Pain condition(s)                                                          | <b>Low back pain</b>                     | Knee, hip, and low back pain | Spine and extremity pain            | Musculoskeletal pain          |
| Pain severity                                                              | <b>Pain refractory to opioid therapy</b> | Mod-severe                   | Mod-severe                          | Mod-severe                    |
| Intervention components and characteristics                                |                                          |                              |                                     |                               |
| Pharmacological                                                            | <b>Opioid changes/ Coanalgesics</b>      | Anti-depressants             | Coanalgesics                        | Analgesics + anti-depressants |
| Behavioral                                                                 | Pain self-management<br>+                | +                            | +                                   | None                          |
| Psychological                                                              | <b>Pain coping skills</b>                | None                         | <b>Cognitive therapy</b>            | None                          |
| Primary outcome                                                            | Pain                                     | <b>Depression/pain</b>       | Pain                                | Pain                          |
| Cost analysis                                                              | <b>Yes</b>                               | No                           | No                                  | No                            |
| Control arm                                                                | <b>Head-to-head active comparator</b>    | Usual care                   | Usual care                          | Usual care                    |

\* Community Based Outpatient Clinics

### **B10. Studies from other research teams that inform the CAMEO trial**

Dr. Jodie Trafton’s ATHENA-Opioid Therapy project informs and complements CAMEO—both studies support PCPs in the safe and effective use of opioids. Dr. Trafton and her team designed and evaluated an automated decision support system (ATHENA) that overlays CPRS (Computerized Patient Record System) and provides PCPs with customized recommendations based on VA/DoD opioid guidelines at the point-of-care. Pilot testing demonstrated that PCPs rated the system as usable and clinically relevant. Preliminary data suggested that the system encouraged safe opioid prescribing.<sup>50</sup> However, PCPs did not use the system in clinical practice as much as expected for two reasons: 1) lack of time to implement ATHENA recommendations; and 2) the recommendations lacked specificity to guide clinical decisions. Furthermore, Dr. Trafton has faced barriers to implementation of the ATHENA-Opioid Therapy because of VA informatics software policies and restrictions.

Dr. Steve Dobscha et al tested a collaborative care model for veterans with chronic pain in a VA HSR&D-funded trial.<sup>51</sup> “Assistance with Pain Treatment (APT)” used a clinical psychologist to deliver the multi-component intervention that included: clinician education, patient assessment, education and activation, symptom monitoring, feedback and recommendations to clinicians, and facilitation of specialty care. Compared to usual care, patients in the collaborative care intervention showed greater improvements in pain-related disability and pain interference. Dobscha et al. concluded that the intervention resulted in modest but statistically significant improvements in pain and mental health outcomes. CAMEO differs from APT in a number of respects, including: a) comparison between two active treatment arms rather than usual care; b) a more structured analgesic algorithm and explicit decision rules for stepping up pharmacological management; c) focus on veterans with moderate to severe CLBP despite opioid therapy; d) and use of a structured behavioral intervention that involves pain self-management/coping skills training. Thus, CAMEO and APT will complement one another, providing key advances to deal with the enormous burden of pain in primary care.

## C1. SIGNIFICANCE AND RELEVANCE TO VHA PATIENT CARE MISSION

*Pain is a critical health problem among veterans.* Chronic pain affects 40%-70% of veterans<sup>2</sup> and is a leading cause of disability, with substantial negative impact on millions of veterans' lives. Pain was the most frequently reported symptom in Persian Gulf War veterans<sup>52</sup> and is expected to be even more prevalent in the current cohort of veterans.<sup>53</sup> Of all musculoskeletal pain conditions, chronic low back pain is the most common. Sinott and Wagner<sup>54</sup> found that among veterans receiving VA care, those diagnosed with low back pain increased steadily from 2000 to 2007 at a rate of 4.8% annually--a rate higher than that for either diabetes or hypertension. CLBP is the most common cause of long-term disability, and the related costs in lost productivity are staggering. The VA Health Economics Research Center (HERC) documented the high costs of care for veterans with CLBP--estimated at more than \$2 billion in 1999.<sup>55</sup>

The VA has pioneered innovative organizational efforts, such as "Pain as the 5<sup>th</sup> Vital Sign" initiative and the VHA National Pain Management Strategy in an effort to address pain among veterans. The VHA National Pain Management Strategy was initiated in 1998, and established pain management as a national priority. The overall objective of the national strategy is to develop a comprehensive, multicultural, integrated, system-wide approach to pain management that reduces pain and suffering for veterans experiencing acute and chronic pain associated with a wide range of conditions, including terminal illness. Central to this objective is to assure access to an interdisciplinary approach to pain care across VA facilities. Comparing the effectiveness of pharmacological and behavioral approaches to treat CLBP is critical in meeting strategy objectives.

In October 2009, the VHA Pain Management Directive 2009-053 was released. This directive outlines the VA's stepped-care model of pain treatment, which provides for management of most pain conditions in the primary care setting. Stepped care is a strategy to provide a continuum of effective treatment of patients from acute pain to chronic pain. "Step One" is centered in primary care and requires the development of a competent PCP workforce to manage common pain conditions. To accomplish this, primary care requires the availability of system supports (nurse care management), family and patient education programs, collaboration with integrative mental health-primary care teams, and post-deployment programs. These efforts are supported by timely access to specialty consultation from pain medicine, mental health, physical medicine and rehabilitation, and care coordination for advanced diagnostic and medical management. It is in this context that the CAMEO trial is proposed. Despite the rising prevalence and negative impact of CLBP, few intervention studies have addressed this condition in the primary care setting.

While numerous treatments are available for the management of CLBP, their effectiveness has not been demonstrated convincingly, and consequently, treatments vary widely. Recent evidence-based guidelines published by the American Pain Society and American College of Physicians<sup>18;19</sup> highlight the wide range of approaches and lack of consensus for management. Analgesic medications remain the most common treatment for CLBP. However, while analgesics are the first line of therapy, clinicians do not use the entire array of analgesics shown in clinical trials to be efficacious, and monitoring of pain outcomes and appropriate adjustments (e.g., maximizing doses or switching medications) is often suboptimal in clinical practice.<sup>56</sup> Analgesics with evidence of benefit in low back pain include acetaminophen, NSAIDs, tramadol, gabapentin, skeletal muscle relaxants, tricyclic antidepressants, and serotonin-norepinephrine re-uptake inhibitors.<sup>18</sup>

The use of opioids for the long-term management of CLBP is increasing. Despite this trend the benefits and risks of opioids remain unclear. A 2007 Cochrane Review<sup>57</sup> found opioids, particularly tramadol, were more effective than placebo for pain relief and improved function. However, side effects were common. Further, only 4 trials were reviewed and they were all fraught with methodological flaws, including lack of generalizability, poor descriptions of study populations, poor intention to treat analysis, and limited interpretation of functional improvement. The authors concluded that high quality studies more closely simulate clinical practice are needed to evaluate the risks and benefits of opioids for low back pain. In sum, though systematic reviews and meta-analyses of opioids for various chronic conditions have shown moderate benefits, the evidence to support the use of opioids, specifically for CLBP, is sparse and inconclusive.<sup>35;57</sup>

Given the rising prevalence of CLBP among veterans, the modest effectiveness of current treatments, and the burden chronic pain places on veterans and their PCPs, our research proposal is significant in several regards. *First*, the CAMEO trial directly addresses a high priority area for the VA and is well aligned with the VHA Pain Management Strategy, recently published VHA Pain Directive, VA Primary Care-Mental Health Integration, and VA's Patient Centered Medical Home Initiative. *Second*, our trial will provide information vital to begin filling an evidence vacuum regarding comparative effectiveness of treatments for chronic pain, especially in the primary

282 care setting. *Third*, opioid prescribing is on the rise within and outside the VA without data to support this  
283 practice. The study interventions being tested have the potential to support or challenge this practice trend.  
284 *Fourth*, CAMEO will extend our current understanding of pharmacological and behavioral approaches. *Fifth*,  
285 the economic evaluation will provide useful information to VA administrators and managers about the short-  
286 term budget implications of implementing each of the interventions

## 287 D. RESEARCH DESIGN AND METHODS

### 288 D1. Conceptual Model for CAMEO Trial

289 The management of chronic pain is complex. As a result, specialists such as orthopedists, anesthesiologists,  
290 rheumatologists, and neurologists, are often consulted. This common practice of referring patients with chronic  
291 pain to specialists with a relatively narrow focus compromises the effort to address whole-person care which  
292 employs a biopsychosocial approach-- an approach that seems best suited for the primary care setting. The  
293 biopsychosocial model posits that the causes and outcomes of many illnesses often involve the interaction of  
294 physical and physiological factors, psychological traits and states, and social-environmental factors. Effective  
295 pain management accounts for these factors. The biopsychosocial model (**Figure 1**) is the most widely  
296 accepted conceptual model in chronic pain management.<sup>58</sup> Comprehensive chronic pain management based  
297 on the biopsychosocial model of pain generation and perception improves outcomes.<sup>59</sup>

298 **Figure 1: Biopsychosocial Model**

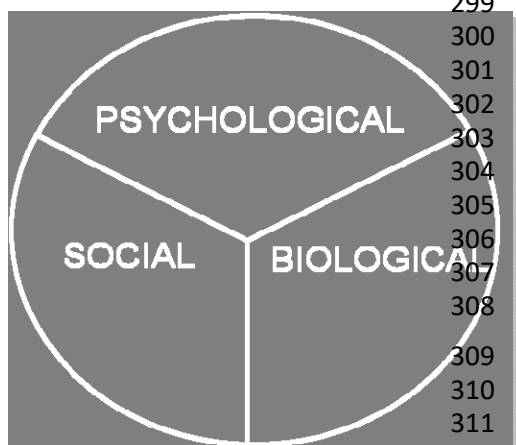

299 Such management focuses on the interplay among biological,  
300 psychological, and social factors that underlie the interventions to  
301 be tested and the key outcome domains to be assessed in  
302 CAMEO. Applied to CAMEO, the pharmacological (opioid  
303 adjustment coupled with co-analgesics) and behavioral (pain self-  
304 management/coping) treatments will not simply address the  
305 **biological** or physical experience of pain. Rather, CAMEO will be  
306 *individually tailored to incorporate patient preferences* all the time  
307 taking into account how **psychological** and **social** factors are  
308 intertwined to influence pain severity, functional interference, and  
309 response to treatment.

310 Collaborative care between veterans, nurses, and psychologists is  
311 fundamental to the integration of biological, psychological, and social  
312 factors in both intervention arms. Nurse care managers and clinical  
psychologists are trained to: 1) pay special attention to patient

313 attitudes, beliefs, and illness behaviors that may influence pain severity, functioning, and adherence to  
314 treatment; 2) assess patients for opioid misuse and psychological distress, especially depression and anxiety  
315 symptoms, which are frequently co-morbid with chronic pain; 3) monitor for adverse effects from treatments  
316 delivered; and 4) create a supportive patient-clinician relationship and social environment that helps veterans  
317 cope more effectively with their pain and to take a more active role and shared responsibility in their  
318 management. Additionally, pain self management/coping skills address psychological aspects of chronic pain.

319 Since chronic pain also demands a combination of health system and organizational elements for effective  
320 management, the Chronic Care Model<sup>60</sup> also provides some theoretical under-pinning for CAMEO. Of the six  
321 Chronic Care Model elements, **delivery system design** (care management, primary care-mental health  
322 integration), **self-management support** (pain self-management/coping skills), **clinical information systems**  
323 (information technology, i.e. CPRS applied at the point of care between care managers and patients), and  
324 **decision support** (medication algorithms that guide treatment decisions) are relevant to our study.  
325 Furthermore, the CAMEO interventions are designed to facilitate “productive interactions” between patients  
326 and providers to improve clinical outcomes for patients with CLBP.

### 327 D2. OVERALL DESIGN

328 Our study population will be 300 veterans with chronic low back pain (CLBP) who have persistent moderate to  
329 severe pain despite long-term opioid therapy. Participants will be recruited from the five primary care clinics at  
330 Roudebush VA Medical Center (RVAMC) and three community based outpatient clinics (Bloomington, Terre  
331 Haute, and Martinsville CBOCs). CAMEO will be a 2-arm, parallel group, randomized comparative  
332 effectiveness trial. Eligible patients will be randomized to one of two arms: 1) guideline-concordant opioid

333 management coupled with algorithm-based co-analgesic treatment (**PHARM**); or 2) pain self-  
334 management/coping skills training (**BEH**). The intervention period will last for 6-months, after which time  
335 patients will be followed for an additional 6 months (total of 12 months). Treatment response will be assessed  
336 at 6-months post-randomization (immediate post intervention) and at 9- and 12-months post-randomization (to  
337 assess for sustained responses). CAMEO will last 4 years including 6 months for start-up; 2.5 years for  
338 recruitment; and 1 year for follow-up, data analysis and manuscript preparation. **Figure 2** shows the CAMEO  
339 trial design.

### 340 **D3. JUSTIFICATION FOR STUDY DESIGN**

341 To justify the CAMEO study design we address the following questions: (1) *why no control group* (2) *why a*  
342 *head to head comparison between pharmacological vs. behavioral treatments*; (3) *why will nurses deliver the*  
343 *PHARM treatment arm and clinical psychologists deliver the BEH treatment arm*; and (4) *why a multi-site trial*.

- 344 (1) *Why no control group?* We decided to jettison the usual care control arm from our previous proposal for  
345 two reasons. First, the revised application is framed more squarely as a comparative effectiveness study in  
346 response to reviewer recommendations. Second, findings from both SCAMP and APT trials have provided  
347 convincing evidence that a “usual care” control arm is ineffective for chronic pain management in the  
348 primary care setting.
- 349 (2) *Why a head to head comparison between pharmacological vs. behavioral treatments?* While there is trial  
350 evidence supporting these treatments, the effectiveness of both approaches has not been convincingly  
351 demonstrated in the primary care setting. Also, these approaches have not been compared against each  
352 other and our current design is a significant and innovative step beyond our previous (SCAMP) and  
353 ongoing pain trials (ESCAPE and SCOPE). We believe a head-to-head comparative effectiveness study  
354 design best answers the question how to most effectively treat CLBP, especially for veterans with CLBP  
355 refractory to opioid therapy. In addition, patients frequently differ in their preferences with respect to  
356 pharmacological and behavioral treatments, and a trial to determine the clinical effectiveness and cost-  
357 effectiveness of two evidence-based treatment options for CLBP has immense importance. This population  
358 of veterans is particularly challenging to PCPs and alternative treatments are critically needed.
- 359 (3) *Why will nurses deliver the PHARM treatment arm and clinical psychologists deliver the BEH treatment*  
360 *arm?* Delivery of the interventions by different clinicians will avoid the potential problem of contamination  
361 across treatment arms raised by reviewers in our last application. Most importantly, the two treatments  
362 represent two different delivery models already embedded in VA primary care: 1) nurse care management;  
363 and 2) mental health-primary care integration (co-location of clinical psychologists and PCPs). Both  
364 delivery models hold promise to decrease the time needed to deliver algorithm-based analgesics or pain  
365 self-management/coping skills and monitor treatment response, side effects, and adherence. Findings from  
366 CAMEO will help clinical managers, hospital leaders, and policy makers make operational decisions related  
367 to system redesign, care delivery implementation, and resource allocation based on local facility strengths,  
368 resources, and patient preferences.
- 369 (4) *Why a multi-site trial?* We added three new study sites compared to the last application to improve  
370 generalizability, to avoid saturating or “exhausting” the potential study participant pool, and to extend our  
371 intervention to CBOCs, an important source of primary care within the VA nationally.

### 372 **D4. STUDY SITES**

373 The RVAMC is an urban, university-affiliated, tertiary care center which provides health care for more than  
374 53,000 veterans and houses five primary care clinics. *The Indy West Clinic, an RVAMC expansion clinic,*  
375 *opened its doors to patients in January 2010 and will serve as a new study site.* The clinics staff 75 primary  
376 care providers (faculty and resident physicians; advance practice nurses), caring for over 20,000 patients who  
377 make over 65,000 visits per year. *The RVAMC is also the parent facility to three community based outpatient*  
378 *clinics—the Bloomington, Martinsville, and Terre Haute Outpatients Clinics.* *The Bloomington and Terre Haute*  
379 *CBOCs staff five primary care providers at each site to provide primary care, prescription and other services to*  
380 *approximately 8,500 veterans in the Bloomington and Terre Haute, Indiana metropolitan areas (approximately*  
381 *1 hour drive from Indianapolis).* The Martinsville CBOC will open in October 2011 and be initially staffed by one  
382 primary care provider. *See support letters from Drs. Kalu and Parmar, the Medical Directors at Bloomington*  
383 *and Terre Haute CBOCs, respectively.*



## 384 D5. RECRUITMENT

385 To plan for recruitment and assess feasibility, we conducted a search of CPRS to determine the number of  
386 RVAMC veterans with at least one primary care visit in the past 2 years (using clinic stop codes), who had low  
387 back pain (i.e., ICD-9 721.x; 722.x, or 724.x), and were on long-term opioids--defined as 3 or more  
388 prescriptions (of  $\geq 28$  days) in the past year. We identified 2,460 unique veterans who met all "feasibility"  
389 criteria. Based on our SCAMP and ESCAPE trials, we have found that  $> 50\%$  who meet the initial feasibility  
390 criteria also meet our study eligibility requirements, which will give us a potential population of over 1,200  
391 patients from which to recruit 300 participants. Our medical center is also expecting more than 8,000 new  
392 enrollees from the Iraqi and Afghanistan conflicts alone for fiscal years 2010 and 2011. Thus, there are a  
393 sufficient number of potential participants available for this study, especially with the addition of three new  
394 recruitment sites. Furthermore, since SCAMP was completed in June 2008 and ESCAPE will finish enrollment  
395 in September 2010, these studies will not "compete" for participants with CAMEO.

396 We have successfully enrolled patients for several moderately sized trials at our medical center. For example,  
397 in the SCAMP trial we successfully recruited over 65% of participants contacted in the VA. In our CRAFT study  
398 of primary care patients, 100 (84%) of 119 eligible patients who were approached were successfully enrolled.  
399 In our "Pain as the 5<sup>th</sup> Vital Sign" pilot study, 159 (77%) of 206 participants surveyed expressed a willingness to  
400 participate in a clinical trial to treat their pain if offered such an opportunity. Based on these prior successes,  
401 we anticipate no difficulty meeting our sample size requirements. In terms of retention, we assessed 87%  
402 (217/250) of SCAMP participants at 6-months and 82% of participants (205/250) at 12-months.<sup>40</sup>

403 Consistent with previous studies conducted at RVAMC, the CAMEO study sample will include approximately  
404 5% to 15% women and at least 15% minorities, thus reflecting the demographics of RVAMC. In our SCAMP  
405 study, African-Americans and women made up 16% and 6% of the veteran sample, respectively. We do not  
406 plan to over-sample women or power sufficiently to explore sex differences in treatment response. The  
407 racial/ethnic composition of RVAMC and participating CBOCs makes exploring racial differences in treatment  
408 response impractical unless we employed special efforts to recruit minorities other than African-Americans.

### 409 D5a. Identifying and Enrolling Potential Participants

410 PCPs will be informed of CAMEO study details and will be asked to provide signed approval so that our team  
411 may contact their potentially eligible patients for participation in the trial. The CAMEO research team, not the  
412 PCPs, will determine eligibility by applying the inclusion/exclusion criteria to potential participants during an  
413 "eligibility interview." In our previous trials, over 95% of physicians have agreed to allow us to approach their  
414 patients. Potential participants will primarily be identified by querying CPRS to create a master list of veterans  
415 who meet the following criteria: 1) primary care visit in past 2 years; 2) moderate pain severity (pain score  $\geq 5$ );  
416 and 3) long term opioid use (3 or more prescriptions for opioids in previous 12 months).

417 This list of potential participants will be updated monthly during the enrollment period and a recruitment letter,  
418 signed by their PCP, will be mailed to qualifying veterans to describe the study. Potential participants will be  
419 contacted by phone within a week after receipt of the letter to assess eligibility and determine their interest in  
420 participating. If the veteran is eligible, an appointment will be scheduled to obtain a signed informed consent  
421 statement (**Appendix 1**) and HIPAA authorization from those who desire to participate. The baseline interview  
422 will be conducted at this time.

423 This method of identifying potential study subjects through CPRS and contacting them for possible study  
424 participation has been approved by both our university IRB and VA Scientific Review Committee for the  
425 SCAMP (which enrolled 200 veterans) and ESCAPE trials (which will enroll 240 veterans). A second method of  
426 enrollment will involve inviting veterans who are enrolled in our IRB-approved Pain Registry, which includes  
427 subjects from our previous pain studies, to participate in the study. A third method, if needed, will be in-clinic  
428 contact of potential subjects by cross-referencing the CPRS list with the weekly appointment roster for each  
429 participating PCP. A fourth method is self-referral by patients responding to study advertisement displayed in  
430 the primary care and post-deployment health clinics and hospital elevators.

### 431 D5b. Eligibility

432 Veterans will be eligible if they have: 1) CLBP of at least moderate intensity; 2) pain for  $\geq 6$  months; 3) on  
433 chronic opioid therapy; and 4) access to a working telephone. Exclusion criteria includes: 1) severe medical  
434 conditions; 2) active psychosis; 3) schizophrenia; 4) active suicidal ideation; 5) pending back surgery; 6)  
435 moderately severe cognitive impairment; 7) involvement in ongoing pain trials; and 8) pregnant or trying to

436 become pregnant. We will exclude veterans with an active substance use disorder (i.e., those currently in  
437 treatment), but to maximize generalizability we will not exclude those with a past history of substance abuse.  
438 These latter patients are at higher risk for opioid misuse and abuse and thus require more intensive monitoring  
439 during the study. To further maximize generalizability and expand our potential sample size, we decided to not  
440 exclude veterans with current (or applying for) disability (service-connected or social security) for CLBP.

441 Since the SCAMP trial was completed in June 2008 and ESCAPE will be completed this fall, veterans who  
442 participated will be potentially eligible for CAMEO. However, current participants in the SCOPE trial will not.  
443 Access to a telephone (landline or cell) is required because most of the outcome assessments will be  
444 conducted via phone. Exclusion criteria will be determined during the baseline eligibility survey *conducted by*  
445 *our study team (not the PCP)* and are designed to eliminate potential participants for whom the proposed  
446 interventions are inappropriate or unsafe and/or for whom there may be disincentives for improvement. These  
447 include severe medical conditions that may limit participation: (1) significant cardiovascular disease: NYHA  
448 functional class 3 or 4 congestive heart failure; systolic blood pressure  $\geq 180$  or diastolic blood pressure  $\geq 105$   
449 mmHg; myocardial infarction, stroke, or TIA within 6 months; chest pain or dizziness with exercise; (2) COPD  
450 or asthma needing home oxygen; (3) cancer (other than skin cancer) receiving treatment or treatment planned  
451 in the next 6 months. Moderately severe cognitive impairment defined by a 6-item validated screener.<sup>61</sup>

## 452 **D6. RANDOMIZATION**

453 After providing written-informed consent and completing their baseline interview, participants will be  
454 randomized to one of two arms: 1) guideline-concordant opioid management coupled with co-analgesic  
455 medications (PHARM); or 2) pain self-management/coping skills training (BEH). Randomization, at the patient-  
456 level, will be done by Christy Sargent, BS (project coordinator) using sealed, opaque envelopes to maintain  
457 allocation concealment. Group assignment will be determined from a table of random numbers created by Xinli  
458 Li, PhD, MS (statistician) in blocks of 3 and 6.

## 459 **D7. CAMEO INTERVENTION DETAILS**

460 The CAMEO interventions will last 6-months. This duration is predicated on the likelihood that prospective  
461 adjustment of medications will be required to optimize pharmacological treatment and pain self-management/  
462 coping skills will require time for the patient to learn and apply to optimize behavioral treatment for CLBP. The  
463 length of the follow-up and schedule of outcome assessments at 3, 6, 9, and 12 months are to detect three  
464 types of treatment effects: 1) “early” (3-months) intervention benefit; 2) immediate post-intervention benefits at  
465 6-months; and 3) sustained benefits at 9- and 12-months post-randomization.

466 Medications are the most common mode of treatment for chronic low back pain in primary care. However,  
467 monitoring of treatment response with appropriate adjustments (e.g., maximizing doses or switching  
468 medications), and assessing adherence, side effects, and signs of misuse (i.e., aberrant behaviors) is often  
469 suboptimal in clinical practice. Many patients continue to have inadequate pain relief and poor functioning  
470 despite long-term opioids. PCPs need other treatment options if their patients’ CLBP does not respond to  
471 opioids or if intolerable side effects emerge. Guided by the biopsychosocial model, effective pain management  
472 should encompass more than pharmacological management directed at pain scores; it should address a  
473 variety of psychological, social, and behavioral factors that contribute to their pain experience. Nurse care  
474 managers or clinical psychologists, working in concert with PCPs, may be in an ideal position to identify these  
475 factors and deliver interventions that relieve veterans’ pain. Because of time constraints routinely faced by  
476 PCPs, and the complexity involved to effectively manage chronic pain, system support for PCPs, such as  
477 nurse care management and mental health-primary care integration (co-location of clinical psychologist), are  
478 critically needed in the primary care setting. Nurse care management for optimized pharmacological  
479 management and psychologist-delivered optimized behavioral/psychological treatment are central to CAMEO.

### 480 D7a. Nurse Care Management for Patients in the Pharmacological (PHARM) Treatment Arm

481 Generic aspects of nurse care management have proven effective in multiple trials, including monitoring  
482 symptoms, assessing adherence, addressing adverse effects, communicating with the primary care physician,  
483 and staffing cases with supervising physicians. The PHARM treatment arm is designed to optimize  
484 pharmacological treatment for CLBP in the primary care setting. Nurse care managers (NCMs) will deliver  
485 guideline-concordant opioid management coupled with algorithm-based co-analgesic treatment (PHARM). We  
486 have successfully trained NCMs to provide pharmacological management (antidepressant therapy in two trials  
487 (AIM—for post-stroke depression and SCAMP) and analgesic therapy in one trial (ESCAPE).

488 The NCMs will meet weekly with physician and pharmacist-investigators (Drs. Bair, Krebs, and Zillich) to  
489 review cases and provide advice on treatment plans. We have successfully implemented this model of case  
490 supervision in four other clinical trials. Also, a physician-investigator (usually Dr. Bair) will be available at all  
491 times to discuss any management issues that arise between the weekly case meetings.

#### 492 D7b. Schedule of Nurse Care Manager Contacts with Patients in the Pharmacological Treatment Arm

493 The timeline of NCM contacts with patients in the PHARM arm is outlined in **Appendix 2**. Patients will receive  
494 at least 9 contacts with the NCMs over the trial period. Participants will have an initial visit at baseline to  
495 assess their current and past treatments for CLBP, pain intensity, and pain-related limitations. Patients' opioids  
496 will be adjusted and/or co-analgesics will be initiated. During follow-up calls, patients' pain severity, response  
497 to treatment, adherence, adverse effects, and desire to change current treatment will be assessed. Follow-up  
498 NCM telephone contacts will occur at 2, 4 and 6 weeks after baseline, and months 2, 3, 4, 6, and 9 months. On  
499 average, these calls last between 10 to 20 minutes. In a focus group study, SCAMP participants found these  
500 calls of high value and did not perceive them as burdensome.<sup>47</sup>

501 Making the intervention reproducible requires an algorithmic approach. For this reason, a minimum of 7  
502 contacts will follow the initial assessment. From previous studies of care management interventions, however,  
503 we know that flexibility is critical to helping some patients make treatment changes and improve clinical  
504 outcomes. We therefore leave some discretion to the NCMs as to whether and when to make supplemental  
505 patient contacts. Also patients sometimes initiate contact with them. Detailed logs will be kept of the timing and  
506 content of patient contacts so that we can describe their activities and measure the "intervention dose" in  
507 reports and papers from CAMEO.

#### 508 D7c. Guideline-Concordant Opioid Management for Patients for Patients in the Pharmacological Arm

509 In clinical practice "doing well" on long-term opioid therapy means: (1) achieving meaningful pain relief; (2)  
510 improving one's ability to function; (3) experiencing minimal or no side effects on steady doses; and (4)  
511 adhering to the rules of opioid therapy outlined in an opioid treatment agreement.<sup>49</sup> Successful chronic pain  
512 management involves balancing the appropriate use of opioids with the prevention of misuse and abuse. While  
513 abuse potential is real, and stories of prescription opioid abuse are frightening to PCPs, addiction during long-  
514 term opioid use is relatively rare. For some patients these medications do offer benefits when they are properly  
515 prescribed and used in accordance with VA/DoD opioid guidelines.<sup>49</sup> Additional principles of opioid treatment,  
516 which have not been a focus of our other trials, will be employed in CAMEO, and include:

- 517 1. Participants will be given a reasonable "opioid trial," i.e., continuing an opioid or trying two or more  
518 agents in order to find the best balance between relief and adverse effects.
- 519 2. Long-acting opioids will be initiated at low doses in patients who have not responded to or experienced  
520 only partial effectiveness from short-acting agents.
- 521 3. Long-acting morphine will be used as the first-line long-acting opioid.
- 522 4. Methadone will be considered if morphine is ineffective or leads to bothersome side effects.
- 523 5. Long-acting opioids will be titrated in a conservative and measured way (until a stable dose is reached)  
524 at interval visits if only partially effective.
- 525 6. Short-acting opioids will be considered for breakthrough pain.
- 526 7. Patients not doing well on one opioid may be tried on another (opioid rotation).

527 Multiple guidelines recommend that patients on long-term opioids need to be monitored regularly, documenting  
528 changes in pain intensity, functioning, and behaviors that may predict misuse and abuse.

#### 529 D7d. Opioid Adherence Monitoring

530 The VA/DoD Clinical Practice Guideline for the Management of Opioid Therapy for Chronic Pain includes  
531 detailed recommendations for opioid monitoring.<sup>49</sup> The overall goal of monitoring is to ensure effective and  
532 safe use of opioids. The risks of opioid misuse and abuse are not well understood. "Misuse" is defined as the  
533 use of opioids in a manner other than indicated or prescribed. Abuse occurs when use is detrimental to the  
534 individual or others, or when opioids are used unlawfully. "Diversion"—the selling, sharing, or trading of  
535 prescription opioids—is an example of abuse. Taking steps to minimize the risk of misuse and abuse is prudent  
536 and must be accomplished by appropriate screening and risk management tools. Others recommend a  
537 "universal precautions" approach for all patients on opioid therapy,<sup>62</sup> because, by themselves, provider  
538 "intuition" and patient self-reports are inadequate to accurately detect "at risk" patients for opioid abuse.<sup>62</sup>

539 Although the efficacy of these tools remains unproven, their inclusion in guidelines and clinical policy is  
540 widespread. Despite this inclusion, these tools are not routinely used. In a chart review study conducted by Dr.  
541 Krebs, these tools were used only 15% of the time at our VA. The most commonly used tools include obtaining  
542 informed consent for chronic opioid therapy, using opioid contracts or agreements, and performing random  
543 urine drug tests. We will assess the risk of misuse, including possible diversion, in CAMEO participants  
544 through review of their clinical history and medications, validated questionnaires, and urine drug tests will be  
545 done randomly at least twice during the study. For the purposes of this study, hair and nail analysis were not  
546 considered feasible or practical since these tools are used rarely clinically for toxicology screening. Patients will  
547 be asked to sign an opioid treatment agreement (**Appendix 3**) at enrollment. Any opioid related problems  
548 observed during the study will be discussed with the patient's PCP to develop consensus on a resolution.

#### 549 D7e. Protocol to Adjust Opioids or Initiate Co-analgesic Medications during Pharmacological Management

550 During the baseline assessment, the NCMs will determine current and past treatments for CLBP and establish  
551 whether or not patients have had an adequate trial (i.e., were analgesics sufficiently dosed). If not, the NCM (in  
552 consultation with Drs. Bair, Krebs, and Zillich) will recommend an adjustment of the patients' opioid or initiate  
553 treatment with a co-analgesic with appropriate dosing and scheduling. Co-analgesics (antidepressants,  
554 anticonvulsants, local anesthetics, and other medications) are a diverse group of drugs that have been studied  
555 in numerous clinical trials, may enhance the effects of opioids, and have independent pain-relieving properties.

556 After prescriptions are written or entered electronically by the study physicians, all study medications will be  
557 dispensed through the RVAMC pharmacy. The NCM will interact regularly with Mr. Win Turner, RPh, the  
558 RVAMC Research Pharmacist, who will oversee study medication dispensing. Participants' PCPs will be  
559 integrated as a "partner" and informed of medication changes in two ways. First, when opioid changes are  
560 recommended, the NCM or Dr. Bair will page the PCP and speak with them directly about the change. To  
561 avoid patient care disruptions these exchanges will be conducted prior or after the PCP's clinic. Second, for co-  
562 analgesic changes a study physician will enter a note in CPRS reflecting the change and then "view alert" the  
563 PCP to keep them informed. Based on our previous trial experience, we expect disagreements between our  
564 research teams' recommendations for a particular opioid or co-analgesic to occur infrequently. However if  
565 disagreements arise, consensus will be reached through telephone or face-to-face discussion with the PCP. If  
566 by chance consensus is not reached, the PCP's decision will take priority. Analgesics initiated by the PCP will  
567 be recorded and tracked by the NCMs and research assistant during the scheduled outcome assessments.

568 Two weeks after adjustment/initiation of analgesics, the NCM will contact intervention participants by telephone  
569 in order to assess response, adherence, and potential side effects. If bothersome side effects have prompted  
570 non-adherence, discontinuation, or reluctance on the part of the patient to continue the analgesic(s), the  
571 analgesic will be changed. Subsequently, nurses will again assess clinical response at four and six weeks  
572 (after baseline) and in months 2, 3, 4, 6, and then at 9 months. Drs. Bair, Krebs, and Zillich will supervise the  
573 weekly care management meetings to discuss patients as well as consultation between meetings as needed.  
574 **Treatment response** will be evaluated in three domains: (1) pain intensity; (2) pain-related disability; and (3)  
575 global improvement. To simulate clinical practice and enhance patient-centeredness of CAMEO, treatment  
576 preferences (i.e., desire to change treatment) will also be assessed and considered prior to treatment changes.

577 The NCM will follow an evidence-based medication algorithm that lists simple analgesics and co-analgesics to  
578 guide treatment decisions. We developed this algorithm (**Table 2**) based upon our synthesis of relevant  
579 research detailed in a manuscript and two book chapters we published.<sup>56;63;64</sup> While we provide a rational  
580 sequence of analgesic selection, we are not testing any particular medication in CAMEO but, instead, are  
581 testing the optimal analgesic management that is both effective and tolerated in an individual patient. Since  
582 some veterans may require a change in analgesics during the trial, this pragmatic, patient-tailored approach is  
583 more similar to clinical practice and approximates the optimal strategy for real-world pain management rather  
584 than an inflexible testing of a single drug. If this approach is found to be effective, it could be implemented as a  
585 novel delivery model for CLBP since nurse care management is already utilized for other chronic conditions in  
586 VA primary care. This structured approach to pharmacological treatment is similar to that effectively applied in  
587 our completed SCAMP trial for optimized antidepressant therapy.

#### 588 D7f. Algorithm-based Co-analgesic Treatment for Patients in the Pharmacological Arm

589 Based on our evidence-based medication algorithm (**Table 2**), we plan on maximizing non-opioid analgesics  
590 (NSAIDs and acetaminophen) and other co-analgesics before escalating or rotating opioids. Co-analgesics  
591 may enhance the effects of opioids and have analgesic effects for CLBP.<sup>56</sup>



592 **Table 2 Step-wise co-analgesic algorithm\***

593 **Step 1 Medications:**

594 **Simple analgesics**

- 595 1. Acetaminophen 650mg mg q 6h (max 2000 mg if cirrhosis or  $\geq 3$  alcoholic drinks/day)  
596 2. NSAIDs: try at least two (except in patients with renal impairment; peptic ulcer disease)  
597 a. 1<sup>st</sup> line: naproxen 500 mg q 12h or 500 q am plus 250 bid (max 1000)  
598 b. 2<sup>nd</sup> line: (i) salsalate 1000 mg q 8h or 1500 q 12h (max 3000); (ii) etodolac 300 mg q 8h or  
599 500 q 12 h (max 1000); (iii) ibuprofen 600 mg q 6h (max 2400); (iv) piroxicam 10mg qd

599 **Step 2 Medications:**

600 **Tramadol**

- 601 1. Start 25 mg BID or TID and titrate to 100 mg QID (max 300 mg if age > 75; max 100 mg BID if  
602 CrCl < 30, 50 mg BID if CrCl <10; max 50 mg BID if cirrhosis)  
603 2. Use concurrent acetaminophen, 500-1000 mg dosed with tramadol TID-QID

603 **Step 3 Medications:**

- 604 1. Gabapentin, titrate up to 900-1200mg tid  
605 2. Cyclobenzaprine 5-10mg qhs-tid  
606 3. Venlafaxine, titrate up to 225mg qd  
607 4. Duloxetine (60 mg qd) and/or Pregabalin (300-450 mg qd, divided into bid doses)

607 **Step 4 Medications:**

608 **TCAs: try at least two**

- 609 1. Amitriptyline, start at 10-25, titrate to 100 mg (max 50 mg if taking an SSRI/SNRI)  
610 2. Nortriptyline, start at 10-25, titrate to 100 mg (max 50 mg if taking an SSRI/SNRI)

611 \*Avoid amitriptyline in older adults—65+ years: Other safety concerns addressed in **Human Subjects**  
612

613 These medications include antidepressants, anticonvulsants, topical anesthetics, and muscle relaxants. Since  
614 no specific analgesic or medication class has proved superior to another, the pain medication algorithm is a  
615 step-wise series of brief individual drug trials, and includes tailored steps depending on the patient's clinical  
616 response and preferences. The concept of "rational polypharmacy"<sup>65</sup> will be applied to find the best balance of  
617 pain relief and side effects. This concept is based on experience that patients often have improved pain with  
618 fewer adverse effects with a combination of moderate doses of medications that work through different  
619 mechanisms, instead of high doses of a single agent.<sup>65</sup> We address safety concerns of using these  
620 medications in the **Human Subjects** section.

621 As mentioned above, **treatment response** for patients will be evaluated by the NCMs using scripted questions  
622 (**See Appendix 6: Telephone Script for Nurse Care Managers**) in three domains: (1) pain intensity; (2) pain-  
623 related disability; and (3) global improvement ("overall, since starting the study, would you say your pain is?")  
624 Patient treatment preferences will be frequently considered. If the patient does not improve or improves in only  
625 one domain, we will recommend a change in treatment if a change is desired by the patient. If 2 or 3 domains  
626 improve we will continue the current plan. For patients requesting regular dose escalations without  
627 improvement, we will conclude that they have opioid-unresponsive pain and will probably not benefit from  
628 opioid therapy. An appropriate "exit strategy" to discontinue the opioids will be implemented if patients are not  
629 achieving appropriate goals of treatment or if they display behaviors (e.g., drug hoarding, aggressive  
630 complaining about pain medications, frequently losing prescriptions, resisting changes to medication, despite  
631 adverse side effects, unsanctioned dose escalations) that may represent misuse or abuse. Of note, all  
632 modifications and titration of patients' opioids will be done with the PCP's approval. For patients whose pain  
633 has not adequately responded at the end of the trial, Dr. Bair will recommend that their PCP consider a pain  
634 clinic referral or other appropriate specialty consultation (presuming analgesic adherence is confirmed), since a  
635 more complex treatment plan may be warranted. At study's end, PCPs will be informed of their patient's  
636 medication regimen and subsequent treatment decisions will be left to the PCP's discretion.

637 D7g. Justification for the Behavioral (BEH) Treatment Arm

638 Non-pharmacological interventions for chronic pain are generally designed to promote self-management by  
 639 providing education, recommendations, and support to increase coping skills. Pain self-management  
 640 interventions foster skill acquisition and practice in an attempt to address patients' attitudes and beliefs, reduce  
 641 psychological distress, and modify illness behaviors to improve health. The success of self-management  
 642 interventions is theoretically linked to intermediate outcomes such as self-efficacy. Self-efficacy is defined as  
 643 the confidence to complete a behavior in order to reach a desired goal and is a strong mediator of behavioral  
 644 change.<sup>66</sup> When an individual feels confident in performing specific behaviors, the efforts toward achieving the  
 645 end result are marked by more persistence, higher goal setting, greater problem solving, and more expended  
 646 effort. Conversely, lacking self-efficacy to manage, cope, or function with pain has been shown to be a strong  
 647 predictor of pain intensity, disability, and depression.<sup>66</sup> Moreover, self-efficacy beliefs have an independent  
 648 effect on pain avoidance behaviors and disability even after controlling for pain severity and depression.<sup>67</sup>

649 Patients with chronic pain often develop maladaptive cognitions/thoughts (i.e. catastrophizing) and behaviors  
 650 (i.e., fear of movement) that contribute to physical and emotional suffering. To manage these challenges,  
 651 cognitive-behavioral interventions teach patients' ways to identify and change maladaptive thoughts, feelings,  
 652 and behaviors and to replace them with those that are more helpful to cope with their pain. In the context of  
 653 CAMEO, clinical psychologists will help participants develop pain self-management skills and challenge  
 654 maladaptive cognitions and modify dysfunctional beliefs veterans may hold regarding their pain-related  
 655 disabilities and interpretations of their pain experience. Participants will learn and maintain more adaptive ways  
 656 of thinking about themselves and their CLBP to reduce pain and disability.

657 In Morley's review<sup>20</sup> of randomized controlled trials of cognitive-behavioral interventions for chronic pain, the  
 658 median number of treatment hours was 16 (range 10-18/h). In recent years, the field of psychology has moved  
 659 towards eight or fewer therapy sessions to address the barriers of resource constraints, insurance coverage  
 660 challenges, and the fact that most psychotherapy clients attend less than eight sessions.<sup>68</sup> Turner et al.  
 661 demonstrated the benefit of brief cognitive-behavioral therapy (CBT) in temporomandibular pain,<sup>69</sup> Similarly,  
 662 brief CBT (i.e. 6-8 sessions) improved physical functioning in patients with fibromyalgia.<sup>70</sup> Another recent  
 663 advance has been the advent of telephone based interventions for arthritis<sup>71</sup> and depression care.<sup>72</sup> Telephone  
 664 based interventions have the advantage of covering multiple, geographically-dispersed veterans and practices.

665 D7h. Overview of Pain Self-Management/Coping Skills Training in the Behavioral Treatment Arm

|                                                    |     |
|----------------------------------------------------|-----|
| <b>Table 3. Pain Self-Management/Coping Skills</b> | 666 |
| • Overview and causes of CLBP                      | 667 |
| • Identifying pain triggers and influences         | 668 |
| • Handling pain flare-ups                          | 669 |
| • Increasing physical activity                     | 670 |
| • Goal Setting and planning                        | 671 |
| • Problem solving                                  | 672 |
| • Overcome fear of movement/re-injury              | 673 |
| • Positive thinking                                | 674 |
| • Activity-rest cycling                            | 675 |
| • Scheduling pleasant activities                   | 676 |
| • Relaxation and deep breathing                    | 677 |
| • Attention-diversion techniques                   | 678 |
| • Tips for better sleep                            | 679 |
| • Effective communication with providers           | 680 |
| • Reframing or changing cognitions                 | 681 |
|                                                    | 682 |
|                                                    | 683 |

Veterans randomized to behavioral treatment arm will receive a series of approximately 9 pain self-management/coping skills training sessions delivered by one of three primary-care based clinical psychologists. The BEH intervention, especially the pain self-management skills manual (**Appendix 4**), was developed partly from our SCAMP trial and proven effective in Dr. Damush's primary care trial of low back pain<sup>22</sup> as well as arthritis trials by Lorig, and Von Korff.<sup>73:74</sup> To compliment the behavioral focus of self-management, the pain coping skills training will draw upon a manualized cognitive-behavioral program (**Appendix 5**) applied in our ESCAPE trial, modeled after previous CBT interventions,<sup>75</sup> and empirically validated in prior studies of pain. Self-management training will focus on increasing self-efficacy to manage low back pain and *coping skills training will focus on the basic CBT concept that pain is a complex experience affected by thoughts, feelings and*

684 *behaviors*. Since optimal application of non-pharmacological interventions for pain involves tailoring to patient  
 685 needs,<sup>76</sup> participants will be introduced to a "menu" of self-management and coping skills (**Table 3**) rather than  
 686 receive a prescribed program. Delivery of the behavioral intervention will employ a flexible approach that is  
 687 easily adapted to individual preferences and perceived need for learning specific pain coping skills. Tailoring  
 688 will include the selection of relevant content and skills and assessment of readiness to change behaviors.<sup>77</sup>  
 689 Patients will choose skills to learn and behaviors to modify that they perceive most relevant to them.

690 Participants will learn to modify and sustain healthy behaviors through goal setting and problem-solving  
 691 techniques. Barriers to engaging in self-management behaviors will be discussed. Each session will involve a

692 discussion of patients' thoughts and feelings about their pain, past treatments for pain, and identification of  
693 barriers to reducing pain severity and interference with activities. To facilitate these discussions, we will draw  
694 upon two models. The first is Emery's "4 A's model" to help veterans modify dysfunctional cognitions related to  
695 pain.<sup>78</sup> Participants are asked to be **aware** of dysfunctional cognitions; **answer** dysfunctional cognitions  
696 (restructure); **act** on the more accurate and/or helpful beliefs; and **accept** imperfection. The second is a  
697 problem solving model to frame and overcome perceived barriers to inadequate pain improvement. This  
698 model has five steps: 1) identify the problem; 2) brainstorm to think of possible solutions; 3) rank solutions from  
699 most to least promising; 4) implement the solution ranked #1; and 5) evaluate—"Did it work? If not, why not?"

#### 700 D7i. Structure and Content of the Behavioral Treatment Arm Sessions

701 The sessions will last a maximum of 45-minutes to optimize participants' attentiveness and performance  
702 required by the cognitive demands of pain coping skills training. Each session will adhere to a common  
703 structure organized into three parts: 1) check-in; 2) intervention, and 3) wrap-up. Prior to each session  
704 participants will be asked to rate the strength and perceived impact for up to four pain beliefs that participants  
705 and the psychologist identified together (**See Appendix 7: Telephone Script for Clinical Psychologists**).  
706 This exercise sets the stage for problem identification and provides a bridge from the last session. The check-  
707 in includes welcoming, a brief pain update on progress and concerns, and collaborative agenda setting of at  
708 least one priority item to provide structure for the session. The intervention represents the bulk of the session  
709 and includes a discussion of old and new barriers identified while applying self-management and pain coping  
710 skills. For example, this generally includes addressing a participant's select dysfunctional cognitions about pain  
711 and its impact by disputing their accuracy, and developing a more adaptive cognition (i.e. cognitive  
712 restructuring). The wrap-up involves patient reflection on what was and was not helpful, a summary,  
713 collaborative goal setting for the next session, and evaluate progress through ratings of select cognitions and  
714 practice assignments. The purpose of these assignments is to apply lessons learned and help assess  
715 understanding of the material. To track the success of interventions and provide a focal point of discussion  
716 during sessions, participants will rate the accuracy of the dysfunctional and alternative cognition which are  
717 tracked on two self-monitoring forms. Patients will receive individualized feedback from the psychologists about  
718 their progress.

719 The pain self-management/coping skills training sessions will be delivered by psychologists using  
720 standardized, written manuals included in **Appendix 4 and 5**. The sessions will occur during the scheduled  
721 clinical contacts (by telephone or face-to-face depending on patient preferences) at within one week of the  
722 baseline, 2, 4, and 6 weeks, and months 2, 3, and 4 and skills reinforced at months 6 and 9. The content of  
723 these sessions are designed to modify coping strategies found to be related to pain and disability. Briefly,  
724 patients will be trained in a variety of evidence-based skills found to help reduce pain and improve function. For  
725 example, patients will be trained in three attention diversion methods: relaxation, imagery, and distraction.  
726 Relaxation training, using a protocol and relaxation tape described by Surwit,<sup>79</sup> will involve concentrating on  
727 muscle tension signals and using them as cues to relax and has been successful in managing negative mood.  
728 Imagery will be taught as an adjunct to relaxation.<sup>80</sup> Patients will practice using pleasant imagery and  
729 changing from one image to another. Distraction techniques will include focusing on physical or auditory  
730 stimuli.<sup>80</sup> Another skill that will be introduced to participants is activity-rest cycling and pleasant activity  
731 scheduling<sup>81-83</sup> which enables patients to pace and increase their activity level. In activity-rest cycling, patients  
732 identify activities in which they overexert themselves (e.g., yard work, home repairs), learn to break those up  
733 into periods of activity and rest (e.g., 45 minutes of yard work followed by 10 minutes of rest), and gradually  
734 increase their activity level as they decrease rest. Patients will identify activities they enjoy such as reading,  
735 doing hobbies, or visiting friends and set and record weekly activity goals. Each patient will develop a written  
736 maintenance plan that includes a list of coping skills, home practice, and a plan for dealing with setbacks and  
737 pain flare-ups.

#### 738 D7j. Steps to assess and assure treatment fidelity in the behavioral arm

739 We will take a number of steps to ensure that the treatment protocol for pain self-management/coping skills  
740 training is delivered uniformly by all treatment providers involved in the study. First, all pain self-  
741 management/coping skills training sessions will be implemented by clinical psychologists with experience  
742 treating patients with chronic pain. Second, all psychologists who participate in the study will receive pain self-  
743 management/coping skills training through workshops facilitated by Drs. Damush and Bair. Third, all  
744 psychologists will be provided with detailed treatment scripts, and the treatment strategies will be taught  
745 through didactic instruction, taped illustrations of techniques from model cases, and role-play of common

746 scenarios. Fourth, the psychologists will document treatment delivery details (content, time, mode of delivery).  
747 Finally to provide supervision, 20% of sessions will be audio-taped and investigators will review tapes for  
748 representative initial, middle and ending sessions for each psychologist during the study to assure that  
749 procedures are followed. Remedial training will be provided if needed i.e. deviation from protocol.

## 750 **D8. DATA COLLECTION PROTOCOL**

751 The schedule of a comprehensive set of outcomes and key variables to evaluate the effectiveness of the  
752 CAMEO interventions are listed in **Table 4**. After obtaining informed consent, a research assistant will  
753 administer an in-depth baseline assessment to gather socio-demographic data, review the patient's history with  
754 an emphasis on previous treatments tried for their pain, and administer several validated measures of pain,  
755 disability and psychological status. All patients will undergo a targeted physical examination, including the  
756 objective functional measurements of strength, range of motion, and flexibility, by one of the study personnel.  
757 The data collection protocol is informed by Initiative on Methods, Measurement and Pain Assessment in  
758 Clinical Trials (IMMPACT) recommendations,<sup>84</sup> biopsychosocial conceptual model, and our previous studies.

759 The baseline interview will take approximately 45 minutes, the 3, 9, and 12-month interviews about *20 minutes*,  
760 and the 6-month (*primary outcome time point*) interviews about *30 minutes*. These assessments will be  
761 completed by our research assistant and conducted by telephone, except for the baseline and 6-month  
762 interviews, which are done in person to establish rapport with participants and to perform the functional  
763 measures. Additionally, we have found phone interviews over 30 minutes to be burdensome to both patients  
764 and interviewers. We have used a battery of measures of similar length and administration time in several  
765 previous or current trials without over-burdening patients. All measures have been conducted both in person  
766 and by phone in multiple prior trials. Both types of administration have routinely been approved by both Indiana  
767 University IRB and VA Scientific Review Committee. The baseline and follow-up outcome assessments will be  
768 conducted by research assistants blinded to treatment assignment.

769 If participants cannot be reached by phone we have employed two strategies to capture all outcome  
770 assessments: (1) send a mailed questionnaire to the veteran with postage paid, self-addressed envelope to  
771 our office; and 2) conduct a face-to-face interview in conjunction with the patient's clinic visit. Veterans  
772 occasionally lack transportation to the in-person interviews. In this situation, we have arranged taxi cab rides to  
773 and from our VA. To protect against data loss, participant responses are collected in two formats: paper and  
774 electronic. The interviews and study databases will be designed in Microsoft Access by Mr. Larry Yang, MS,  
775 VA data manager. To maintain confidentiality of veterans interviewed, our research assistants will adhere to  
776 careful interview and data collection procedures. First, participants will be told that their responses will remain  
777 confidential and that every effort will be made to fulfill that assurance. Second, the interviews will be  
778 conducted in an appropriate setting (i.e., private interview room). Third, completed surveys will be stored in a  
779 secure location in our Center in a locked file cabinet.

### 780 D8a. Primary Outcome Measure

781 The Brief Pain Inventory (BPI) was developed to assess the severity of pain and the impact of pain on daily  
782 functioning, and has been validated in primary care studies.<sup>40;85</sup> The BPI is an 11-item measure that provides  
783 scores for pain intensity and pain-related functional impairment. The **BPI pain intensity score** is an average of  
784 four ratings of 0 ("no pain") to 10 ("pain as bad as you can imagine") for current, least, worst, and average pain  
785 in the past week. The **BPI pain interference score** averages seven ratings 0 ("does not interfere") to 10  
786 ("interferes completely") of interference with general activity, mood, walking ability, normal work, relations with  
787 other people, sleep, and enjoyment of life. The **BPI total score** is the average of the intensity and interference  
788 scores to provide a summary score. The BPI will be used as the primary outcome measure for several  
789 reasons. First, it has been shown to have strong internal consistency both in its original validation study  
790 (Cronbach's alpha = 0.77) as well as in our SCAMP study (alpha = 0.83 for BPI severity and alpha = 0.88 for  
791 BPI interference).<sup>40;85</sup> Second, it has proven to be sensitive to change in our SCAMP trial (absolute difference  
792 in BPI total score between intervention and control groups of 1.39,  $p = <.001$ , effect size of 0.49).<sup>40</sup> Third, the  
793 BPI assesses the two most important domains (severity and interference) recommended for pain studies.<sup>84</sup>

794 In addition to our main outcome measure of pain severity and pain interference with activities, we will also  
795 measure several other secondary outcomes recommended by the IMMPACT guidelines,<sup>84</sup> and consonant with  
796 the biopsychosocial model at each follow-up assessment. These include depression, anxiety, health related  
797 quality of life, pain beliefs, *social support*, and substance misuse. These variables are important to assess as



798 key moderators or mediators of intervention effects. We will also assess opioid-related adverse effects with  
799 the rationale that optimized pharmacological or behavioral treatment may limit these side effects. Since the  
800 incidence and prevalence of opioid misuse in patients treated for chronic pain is unclear and remains a topic of  
801 debate, this will be examined with complementary methods (self-report and urine drug testing). Finally,  
802 objective functional measures assessing back strength, flexibility, and range of motion will be assessed.

#### 803 D8b. Measures, Schedule, and Mode of Administration

804 Baseline patient characteristics will be evaluated with an interview adapted from our previous trials and will  
805 include socio-demographics, disability compensation, comorbid medical and psychiatric disorders, and prior  
806 treatments for pain. We will also regularly assess use of other treatments for chronic pain (other medications,  
807 exercise, physical therapy, complementary and alternative medicine modalities, and interventional modalities)  
808 as well as prescription medication use. For medications, we will record prescribed doses, administration  
809 schedule, and number of pills prescribed. We will also assess concurrent prescriptions, especially  
810 antidepressants and benzodiazepines.

#### 811 D8c. Description of Specific Measures

812 **Pain Severity and interference with activities** will be assessed with the Brief Pain Inventory (BPI).

813 **Pain-related disability**: The Roland Disability Scale is a 24-item pain-specific measure of physical disability  
814 originally validated in patients with back pain.<sup>86</sup> It has been used widely in low back pain trials because of its  
815 high degree of reliability, validity, and responsiveness to change.

816 **Psychological symptoms** are frequently associated with chronic low back pain and will be assessed by:

817 The PHQ-9 will be used to assess depression severity. Several studies have validated the PHQ-9 as a  
818 diagnostic measure with excellent psychometric properties.<sup>87</sup> Internal consistency has consistently been shown  
819 to be high (Cronbach's alpha > 0.80) and test-retest assessment showed the PHQ-9 to be a responsive and  
820 reliable measure of depression treatment outcomes.

821 The GAD-7 has demonstrated reliability (alpha = 0.89) and validity (criterion, construct, factorial, and  
822 procedural) as a measure of anxiety in the general population and primary care.<sup>88</sup>

823 The Primary Care PTSD Screen (PC-PTSD) has been validated for use in primary care. The sum of the 4  
824 yes/no items yields a score ranging from 0 to 4, with scores  $\geq 3$  considered positive for active PTSD.  
825 Sensitivity is 78% and specificity is 87% compared to clinician interview.<sup>89</sup>

826 The PCL-17 is derived from the DSM III-R criteria for PTSD, and is used for diagnosis and as a severity  
827 measure. The PCL has demonstrated sensitivity and specificity >70%. The AUDIT-C has been validated as an  
828 effective screening test and diagnostic tool for alcohol misuse in primary care sample. A review concluded that  
829 the psychometric properties of the AUDIT, such as test-retest reliability and internal consistency are  
830 favorable.<sup>90</sup>

831 **Opioid Misuse**: The COMM (Current Opioid Misuse Measure) is a 17-item instrument designed to monitor  
832 misuse and aberrant behaviors in patients prescribed opioids. It has excellent internal consistency and test-  
833 retest reliability. ROC curve analysis showed good accuracy for detection of opioid misuse.<sup>91</sup>

834 Urine drug screens will be employed *at random* during the study for two reasons: (1) to detect substances that  
835 should not be present in the urine; and (2) to detect the absence of prescribed opioids.

836 **Opioid Side Effects**: The Numerical Opioid Side Effect (NOSE) is a new 10-item tool designed to assess the  
837 most common opioid-related side effects (e.g., nausea, constipation, sleepiness).<sup>92</sup>

838 **Other secondary outcome measures** and potential predictors of treatment response will be assessed:

839 The Patient Health Questionnaire stressor scale is a 10-item scale of common stressors scored 0 to 20 which  
840 has been used in large primary care studies.

841 The Medical Outcomes Study SF-36 is well-established generic measure of health status<sup>93</sup> that assesses  
842 physical and mental functioning in 8 domains and gives highly reliable, valid and responsive summary scores.

843 The Pain Catastrophizing Scale a 13-item scale that assesses catastrophizing—a pain belief that have been  
844 found to be strong predictor of poor treatment response.<sup>94</sup> Validation studies examining the PCS have found  
845 strong evidence of criterion-related, concurrent, and discriminant validity.

846 The Centrality of Pain Scale is a 10-item measure to measure how central chronic pain is to a patient's life.

847 Pain self-management behaviors will be assessed with 7 items that proved most useful in the pain self-  
848 management program in the SCAMP trial in terms of patient uptake and association with treatment outcomes.  
849 Selected items from The PROMIS-28 profile will be administered for pain, fatigue and sleep.  
850 The McGill Pain Questionnaire is a 15-item measure for describing and measuring pain in subjects.  
851 Substance use problems will be assessed by asking questions about the use of others' prescription drugs or  
852 street drugs.  
853 The Patient Global Impression of Change (PGIC) is a single item measure to assess overall clinical response.  
854 This well-validated and reliable global rating scale is often used as the gold standard for determining clinically  
855 important differences for pain outcomes.<sup>95</sup>  
856 Opioid dose—we will assess mean daily opioid dose in milligram equivalents of morphine at baseline, 6 and  
857 12-months to compare the percent of patients in each study arm who had their opioid dose decreased/  
858 increased during the course of the study.  
859 Health Care Utilization and Costs: will be assessed at the end of the 12-month study period for each patient  
860 using complete data available in CPRS. This will include all outpatient and emergency room visits, inpatient  
861 days, radiographic and lab tests, medical and surgical consultations, drugs, and procedures for low back pain.  
862 Functional Improvement Measure: Gottlieb et al<sup>96</sup> developed a functional improvement measure for patients  
863 with low back pain who were undergoing rehabilitation. This instrument is a performance-based measure that  
864 can quantify functional capacity and can help identify the level of change associated with treatment.  
865

**Table 4. Outcome Assessment Protocol: Measures and Schedule of Administration**

| Domain                             | No | Measure*                                                                                | Items | Time (min) | Schedule |      |      |      |       |
|------------------------------------|----|-----------------------------------------------------------------------------------------|-------|------------|----------|------|------|------|-------|
|                                    |    |                                                                                         |       |            | BL       | 3 mo | 6 mo | 9 mo | 12 mo |
| <b>Covariates</b>                  | 1  | Demographics; contact information; disability compensation, comorbidity; pain treatment | 36    | 10         | X        |      |      |      |       |
| <b>Pain severity/ interference</b> | 2  | Brief Pain Inventory                                                                    | 11    | 3          | X        | X    | X    | X    | X     |
| <b>Pain disability</b>             | 3  | Roland Disability Scale                                                                 | 24    | 6          | X        | X    | X    | X    | X     |
| <b>Psychological</b>               | 4  | PHQ-9 Depression                                                                        | 9     | 2          | X        | X    | X    | X    | X     |
|                                    | 5  | GAD-7 Anxiety                                                                           | 7     | 2          | X        | X    | X    | X    | X     |
|                                    | 6  | VA PTSD Screener                                                                        | 4     | 1          | X        |      | X    |      |       |
|                                    | 7  | VA PTSD Checklist (PCL-17)                                                              | 17    | 4          | X        |      | X    |      |       |
|                                    | 8  | AUDIT-C                                                                                 | 10    | 3          | X        |      | X    |      | X     |
| <b>Stress</b>                      | 9  | PHQ Stressor Scale (PSS)                                                                | 9     | 3          | X        |      | X    |      | X     |
| <b>Opioid Misuse</b>               | 10 | Current Opioid Misuse Measure (COMM)                                                    | 16    | 4          | X        |      | X    |      | X     |
|                                    | 11 | Urine Drug Screen                                                                       | NA    | NA         |          |      |      |      |       |

|                                       |    |                                                     |      |    |   |   |   |   |   |
|---------------------------------------|----|-----------------------------------------------------|------|----|---|---|---|---|---|
| <b>Side effects</b>                   | 12 | Numerical Opioid Side Effect                        | 10   | 2  | X | X | X | X | X |
| <b>Generic HRQL</b>                   | 13 | SF-36                                               | 3613 | 3  | X |   | X |   | X |
| <b>Pain beliefs</b>                   | 14 | Pain Catastrophizing Scale                          | 10   | 3  | X |   | X |   | X |
| <b>Pain coping</b>                    | 15 | Centrality of Pain Scale                            | 10   | 3  | X |   | X |   | X |
| <b>Response</b>                       | 16 | Global Rating of Change                             | 1    | 1  |   | X | X | X | X |
| <b>Opioid dose</b>                    | 17 | Morphine mg equivalents                             | NA   | NA | X |   | X |   | X |
| <b>Back Function</b>                  | 18 | Functional Improvement Scale                        | NA   | 10 | X |   | X |   |   |
| <b>Pain self-mgt behaviors</b>        | 19 | SCAMP Self-Management Behaviors (SMB)               | 7    | 2  | X |   | X |   | X |
| <b>Health Related quality of life</b> | 20 | PROMIS profiles – pain (12), fatigue (4), sleep (4) | 20   | 5  | X |   | X |   | X |
| <b>Pain intensity</b>                 | 21 | McGill Pain Questionnaire                           | 15   | 3  |   |   |   |   |   |
| <b>Substance use</b>                  | 22 | Illicit use                                         | 6    | 1  | X |   |   |   |   |

866

867 D8d. Other treatments: Co-interventions

868 Participants will continue to be followed by their PCP for all medical care not related to the trial including  
869 continuation of other medications as prescribed, clinic visits, and other care. Specifically, use of analgesic  
870 medications (both over the counter and prescribed) will be permitted (and assessed), both to adjust for co-  
871 intervention differences between groups in the analyses and to assess as secondary outcomes. For example,  
872 decreased opioid requirements in both treatment arms may be one indicator of better pain control. All  
873 prescriptions, clinic visits, diagnostic tests, referrals, and hospitalizations will be collected using CPRS VISTA.

874 **D9. STATISTICAL CONSIDERATIONS**

875 CAMEO will involve a 2-arm, parallel-group, randomized trial design with two active treatment arms being  
876 compared. Since the patients of this trial are not blinded with respect to treatment assignment, it is possible  
877 that the observed outcome (if positive) is partially attributed to expectation bias. We will randomize at the  
878 patient rather than the physician level for two reasons: (1) randomization at patient level saves sample size;  
879 and (2) patients from the same physician in the two treatments arms will adjust for “physician effect.”  
880 Contamination will also be low because there is relatively minimal involvement required of PCPs in CAMEO. In  
881 addition, randomization will be stratified by depression status (yes or no) and prior substance abuse treatment  
882 (yes or no) to avoid potential imbalance of these factors between the two arms. Xinli Li, PhD, MS (statistician)  
883 will provide a randomization chart to randomize patients in blocks of 3 and 6.

884 **D9a. Sample size**

885 Our sample size is calculated based on estimated intervention effects on the primary outcome; the Brief Pain  
886 Inventory (BPI) total score. The BPI total score is continuous measure: a 0-10 scale and reflects the average of  
887 the BPI pain severity and interference scores. The SCAMP trial<sup>40;98</sup> showed that the standard deviation was  
888 2.44 for the BPI total score. We will assume this is the common standard deviation across the two treatment  
889 arms. A between-group treatment difference of 1 point in the BPI total score represents a minimum clinically  
890 meaningful intervention effect (i.e. 0.3 SD effect size).<sup>99</sup> With a two-sided test at alpha=0.05, we will have 80%  
891 power to detect a 1-point difference in BPI score with 135 subjects in each arm. With a conservative 12%  
892 attrition, we will then need  $(135*2)/0.88 = 300$  subjects (150 in each arm). Because of clinical equipoise, it is  
893 not clear which treatment approach will produce the most meaningful differences in outcomes. Therefore, the

894 null hypothesis of no clinically significant difference between the two active treatment arms would be satisfied  
895 given a treatment effect size  $< 0.3$  standard deviation. We expect both active treatment arms to significantly  
896 improve pain intensity, function, and other relevant outcomes at 6 and 12-months compared to baseline.

#### 897 D9b. Data analysis: Baseline Comparability

898 Because of the size of this study, it is expected that randomization will produce treatment groups that are  
899 comparable and balanced. To test this assumption, we will tabulate baseline characteristics of the two trial  
900 arms for potential imbalance in variables such as socio-demographic variables, medical and psychiatric  
901 comorbidity, duration of back pain, and current and prior pain treatments. Continuous variables will be  
902 assessed with graphical displays and summary statistics (means, standard deviation, range, etc). Frequency  
903 distributions and percentages will be calculated for categorical data.

#### 904 D9c. Primary outcomes at each time point and mixed-effects models for repeated measures

905 We will summarize this primary outcome at each time point (3, 6, 9 and 12 months) for both study arms. The  
906 difference between time points will be compared between the two treatment arms. To compare the primary  
907 outcome at each time point relative to baseline within each arm, paired T-test or Wilcoxon rank-sum test will be  
908 used. Between-arm comparisons will be based on similar statistical tests. The primary endpoint will be at 6  
909 months. Secondly, “early” response will be assessed at 3 months and “sustained” response at 9- and 12-  
910 months. We plan an intent-to-treat analysis approach.

911 Since the primary outcome is measured repeatedly at baseline, 3, 6, 9, and 12 months, we will also fit linear  
912 (for continuous variables) or non-linear (for categorical variables) mixed-effects models to data at all time  
913 points, which accounts for the correlation of measurements from the same subject/physician and allows  
914 adjustment of confounding factors. To illustrate the idea, BPI total score is denoted by  $Y_{ik}$  of the  $k^{\text{th}}$  measure of  
915 subject  $i$ . We will fit the following model:

$$\log \text{it}(Y_{ik} = 1) = X_{ik}\beta + \alpha_{i0} + \alpha_{i1}t_{ik} + \lambda_j,$$

916 where  $\alpha_{i0} \sim N(0, \epsilon^2)$ ,  $\alpha_{i1} \sim N(0, \delta^2)$ ,  $\lambda_j \sim N(0, \phi^2)$ .

917 Here the vector  $X_{ik}$  represents fixed covariates for patient  $i$  at time  $k$ , and  $\beta$  represents the corresponding  
918 coefficients. The fixed covariates will include critical covariates such as treatment arm, demographics, and  
919 other patient characteristics.  $\alpha_{i0}$ ,  $\alpha_{i1}$  and  $\lambda_j$  represent the random effects, which are the patient-specific  
920 intercept, patient-specific slope and the physician-specific intercept ( $j$  index the physician). The fit of the model  
921 will be assessed using graphical techniques and regression diagnostics. We will also examine potential  
922 interaction terms among the covariates, particularly interactions between each treatment arm and other  
923 covariates. If there is a significant treatment effect, we will report the 95% confidence interval of the treatment  
924 difference after adjusting for a pre-specified set of baseline covariates. The model will be fitted by SAS  
925 procedures MIXED and NL MIXED. All statistical Analysis Software (SAS, version 9.1, Cary, N.C.).

#### 926 D9d. Missing data

927 Missing data are unavoidable in longitudinal studies. Based on our prior studies, we anticipate a possible  
928 dropout rate between 8% and 12%, which is reflected in the sample size calculation. We will compare patient  
929 demographic characteristics between those who stay in the study and those who drop out to examine whether  
930 or not there are characteristics that discriminate drop-outs and non-drop-outs. It is possible that the dropout  
931 mechanism does not depend on unobserved outcomes (Missing At Random, or MAR),<sup>100</sup> where no bias will be  
932 introduced by ignoring the missing-data mechanism. We can simply use all observed outcomes for the  
933 analysis. Under circumstances where power loss is of concern, we will use multiple imputation procedures to  
934 make use of all relevant observed variables to enhance the power. The SAS procedure MI and MIANALYZE  
935 will be used for multiple imputation. In case drop-outs are Missing Not At Random (MNAR), which means the  
936 likelihood of drop-out depends on un-observed outcome, potential bias can be introduced if the miss-data  
937 mechanism is ignored. We will make various assumptions regarding the missing-data process based on the  
938 best of our knowledge. With these assumptions, we will fit proper models, either in the form of selection  
939 model,<sup>101</sup> pattern mixture model,<sup>102</sup> or latent variable model to account for the missing-data process. A  
940 sensitivity analysis will be conducted to compare the results based on different assumptions and models and to  
941 assess the robustness of the inference.



944 D9e. Secondary Analyses

945 We will employ several secondary analyses to assess the effectiveness of the PHARM and BEH treatment  
946 arms compared to each other in improving:

- 947 • Patient global impression of change
- 948 • Health-related quality of life
- 949 • Opioid dose

950 Analytic techniques will be similar to those previously described. Since there will be a number of secondary  
951 outcomes, it presents a multiple-comparison situation. We will use Bonferroni approach to adjust for statistical  
952 significance threshold when the number of tests is less than 20. Otherwise, we will use the false discovery rate  
953 (FDR)<sup>103</sup> to control the magnitude of false positives.

954 We will also stratify our analysis based on a baseline depression status (PHQ-15) and prior treatment for  
955 substance abuse disorder (yes or no on the eligibility screener). Our previous research indicated that 30% to  
956 40% of patients will have clinically significant depression, which adversely affects pain outcomes. Thus,  
957 depression is a potential moderator and prevalent enough to warrant stratification. In addition, since substance  
958 abuse (including opioids) is relatively common in chronic pain populations and poses unique management  
959 challenges, we will further stratify our analysis by prior treatment for a substance abuse disorder.

960 D9f. Economic evaluation

961 We will conduct a cost-consequences analysis to determine changes in health care utilization that may offset  
962 the intervention costs between treatment arms. To conduct this analysis, we will use established methods<sup>104</sup> to  
963 estimate direct costs of the interventions and health care spending for study participants during the 12-month  
964 enrollment period from the perspective of the VA. Sensitivity testing, according to guidelines from VA Health  
965 Economics Research Center (HERC), will be performed to account for assumptions, including changes in  
966 intervention costs and changes in costs related to inpatient or outpatients services.

967 D9g. Costing

968 We will use both micro- and gross (average) costing method<sup>105;106</sup> to estimate intervention and health care  
969 utilization costs, respectively. Applying HERC guidelines, we will measure intervention-related activities and  
970 their associated costs.<sup>104</sup> These intervention costs will include: 1) medication costs for patients; 2) estimates of  
971 overall pharmacy costs from the DSS pharmacy file for both study arms; 3) study nurse and psychologist costs  
972 derived from time and activity logs that they will complete for each intervention-related activity (preparation  
973 for and delivery of interventions; attempted and completed calls to patients; patient assessment, education,  
974 and counseling; record keeping and review after intervention contacts; and communication between them and  
975 PCPs); 4) Nurse and psychologist average salaries plus fringe benefits; 5) supervising intervention physicians/  
976 pharmacist time; 6) study materials provided to intervention patients; and 7) overhead.

977 We will use VA DSS data to obtain health care utilization and cost estimates of trial patients. From the VA  
978 Patient Treatment File (PTF), we will collect hospital discharge date, days of hospital stay in each treating bed  
979 section/specialty and ICD-9 diagnoses (especially primary or secondary diagnoses) of low back pain assigned  
980 to each stay and determine the cost per admission. From the Outpatient Care File (OPC), we will collect dates  
981 of any outpatient visits for low back pain, location of care (stop code), CPT codes assigned to each visit, and  
982 the type of provider delivering care. We will classify all visits into primary care, emergency, pain, specialty  
983 medicine or surgery, mental health or substance use disorder, and other treatments based on clinic identifiers.

984 The number of outpatient prescriptions, especially for analgesic and psychotropic medications, will be found in  
985 the DSS NDE Pharmacy Datasets from VA Information Resource Center (VIReC)<sup>107</sup> to determine the cost per  
986 prescription. Laboratory and radiographic testing will be collected to determine the number of tests for low  
987 back pain evaluation and the costs per test. The cost of other care will be obtained from utilization data  
988 included in VA Austin databases. For non-VA care, covered by the VA, fee basis files will be merged into DSS  
989 data<sup>108</sup> For non-VA care not covered by the VA, we will rely on patient self-report of outpatient visits and  
990 hospitalizations. Since VA utilization data does not include cost estimates, the above mentioned data sets will  
991 be merged to the HERC average cost datasets to estimate the costs associated with VA utilization for each  
992 participant.<sup>109;110</sup> Costs will be converted to a standardized year using the Consumer Price Index (CPI). The  
993 CPI is calculated on the basis of 305 items representing all goods and services purchased for everyday living

994 by all urban residents. We will use the general CPI for primary analysis and the Gross Domestic Product  
995 Implicit Price Deflator for a sensitivity analysis.

#### 996 D9h. Analysis

997 The aim of the cost consequences analysis will be to compare intervention and health care costs for each  
998 study arm. The dependent variable will consist of primary cost outcomes calculated from the VA perspective.  
999 Having obtained the relevant VA healthcare utilization events, the healthcare event requires **valuation**, which  
000 is the task of assigning a reasonable market-level dollar for the expense amount. For each patient, outpatient  
001 events (visits, procedures, labs, medications, etc.) and inpatient DRGs and medical events (procedures, labs,  
002 medications, etc.) are captured from these patient-specific administrative datasets. VHA databases provide  
003 sufficient outpatient and inpatient procedure and associated treatment classifications (by CPT-4, DRG and  
004 ICD-9 codes) to allow valuation and this has been accomplished at the VA's Health Economics Resources  
005 Center. Dr. French has created similar datasets in other VA funded studies and publications. For health care  
006 utilization and the associated costs, we will compare inpatient days, outpatient visits, telephone care, number  
007 of prescriptions and radiographic. However, we may not be able to include inpatient costs because  
008 hospitalization may occur rarely during the trial which, coupled with high inpatient costs, makes estimates of  
009 between-group differences imprecise.

010 The two study arms will be specified as two sets of independent binary control variables (Arm 1, Arm 2); Arm 1:  
011 =1 for pharmacological (PHARM), =0 otherwise; Arm 2: =1 for behavioral (BEH), =0 otherwise; The model will  
012 be adjusted for comorbidities, age, and other potential confounders. Univariate, bivariate and regression  
013 techniques for repeated measures will be used to estimate the healthcare events and expenditure amounts.  
014 Regression diagnostic techniques will be used to determine if the assumptions of independence, normality and  
015 homoskedasticity are met for the cost values. Log transformation of healthcare expenditure dependent  
016 variables is common due to skewed distributions. Multicollinearity will be assessed through an examination of  
017 the zero-order correlation matrix and by examination of condition number bounds. Residuals will be analyzed  
018 to identify outliers. In some analyses, the dependent variables of VA expenditures per episode of care will be  
019 used in regressions and may require a variable transformation to normalize the dependent variable's  
020 distribution. In this case we will use an econometric transformation, the inverse hyperbolic sine (IHS)  
021 transformation:  $Z = \log [2Y + (2^2Y^2 + 1)^{1/2}] / 2$ . Note: This transformation is defined for all real numbers including  
022 zero, negative values, and positive values, making it appropriate for use with dollar values.

023 Costs will be reported in current year's dollars. Sensitivity analyses will be used to account for assumptions,  
024 including changes in intervention costs and changes in costs related to inpatient or outpatients services. If the  
025 interventions are found to be differentially more effective and costly, we will perform a cost-outcome analysis  
026 (i.e., incremental cost-effectiveness). We will estimate the effect of the interventions on the primary outcome  
027 (BPI total score). The incremental cost to achieve a clinically meaningful decrease in BPI total scores due to  
028 the interventions, i.e., the cost-effectiveness ratio, is calculated as the difference in intervention costs between  
029 the two treatment arms, divided by the difference in effectiveness between groups.

#### 030 Intervention Costs + ( $\Delta$ Health Care Costs)

$$031 (\Delta \text{BPI}_{\text{PHARM Treatment}}) - (\Delta \text{BPI}_{\text{BEH Treatment}})$$

032 where  $\Delta$  BPI = change in BPI score, and  $\Delta$  Health care costs = difference two groups

### 033 **D10. PROJECT MANAGEMENT PLAN**

#### 034 D10a. Project Timeline

035 The 1st quarter in year 1 will involve hiring and training personnel. Important steps will include: (1) finalizing  
036 treatment algorithms; (2) training the study nurses in assessing pain, and opioid and analgesic management;  
037 (3) training clinical psychologists in delivering pain self-management/coping skills; (4) training the research  
038 assistant in screening, enrolling, and consenting study participants; (5) programming the electronic medical  
039 records to identify potential study subjects based on low back pain diagnosis and opioid treatment; and (6)  
040 obtaining permission from individual treating physicians to approach patients of theirs who might be eligible.  
041 During the next 2.5 years, we will enroll 300 participants (randomizing 135 each group: 1) pharmacological;  
042 and 2) behavioral treatment. Enrollment will average 4 new participants per week (10 per month). The 300  
043 participants will be treated for 6 months. Participants will have outcome assessment at baseline, 3, 6, 9, and 12  
044 months. Thus, enrollment will be conducted from the 2<sup>nd</sup> quarter (year 1) until the 4<sup>th</sup> quarter (year 3); the

intervention phase from 2<sup>nd</sup> quarter (year 1) until 3<sup>rd</sup> quarter (year 4); and outcome assessments from 2<sup>nd</sup> quarter (year 1) until the end of study period. Baseline analysis will begin at the beginning of year 4 and conducted during the final 12 months of the study (separate baseline, 6 month, and end-of-study analyses). Main reports and manuscripts will be prepared in the 3<sup>rd</sup> and 4<sup>th</sup> quarters of Year 4. As shown in the gannt chart below, this is a 4-year project.

| <b>CAMEO Study Timeline</b> |        |   |   |   |        |   |   |   |        |   |   |   |        |   |   |   |
|-----------------------------|--------|---|---|---|--------|---|---|---|--------|---|---|---|--------|---|---|---|
| Quarters                    | Year 1 |   |   |   | Year 2 |   |   |   | Year 3 |   |   |   | Year 4 |   |   |   |
|                             | 1      | 2 | 3 | 4 | 1      | 2 | 3 | 4 | 1      | 2 | 3 | 4 | 1      | 2 | 3 | 4 |
| Start-up                    |        |   |   |   |        |   |   |   |        |   |   |   |        |   |   |   |
| Enrollment                  |        |   |   |   |        |   |   |   |        |   |   |   |        |   |   |   |
| Intervention                |        |   |   |   |        |   |   |   |        |   |   |   |        |   |   |   |
| Assessments                 |        |   |   |   |        |   |   |   |        |   |   |   |        |   |   |   |
| Analysis                    |        |   |   |   |        |   |   |   |        |   |   |   |        |   |   |   |
| Manuscripts                 |        |   |   |   |        |   |   |   |        |   |   |   |        |   |   |   |

**D10b. Overall project coordination and facilities**

Overall project coordination will be led by Dr. Bair (PI) and Ms. Sargent (Project coordinator). Ms. Sargent will coordinate all aspects of the project, trouble-shoot any problems, and provide regular updates on recruitment progress. We have secured commitments from the appropriate clinical services to conduct the study (see included letters of support). Drs. Bair, Krebs, Damush, Zillich, French, and Kroenke have office, meeting and research space within the HSR&D Center for Implementing Evidence-based Practice (CIEBP) at the RVAMC. Dr. Shen’s office is within the Health Information Technology Services building, a 5-minute drive from CIEBP.

**D10c. Investigator roles**

The proposed project will be conducted by a strong multidisciplinary team with extensive experience in areas relevant to this study. Specific roles of the research team are outlined in more detail in the budget justification. The efforts of each of the investigators will be coordinated by Dr. Bair and Ms. Sargent to develop plans, review progress, discuss analysis results, and set priorities for the research team. Matthew Bair, MD, MS, has expertise in pain interventions in primary care and chronic pain and depression comorbidity. He will serve as PI and provide overall study direction. Erin Krebs, MD, MPH, is a health services-investigator with expertise in the safe and effective use of opioids. She will serve as Medical Director for the study and co-lead (with Dr. Bair) the weekly care management meetings. Kurt Kroenke, MD, is internationally known for his expertise in symptoms and mental health research in primary care and will contribute senior guidance on all phases of the study. Teresa Damush, PhD, will oversee the delivery of the pain self-management/coping skills intervention to patients and will train the psychologists to administer the program. Alan Zillich, PharmD, is a recipient of a HSR&D CDA-2 entitled “Implementation Strategies to Improve Prescribing of Pharmaceuticals.” He will contribute his expertise in the safe and effective use of analgesics for intervention patients. Dustin French, PhD, is a health economist-investigator with extensive experience in medication safety and VA large database research. Dr. French will guide the economic analysis. Zhangsheng Yu, PhD, is an experienced clinical trial biostatistician who will lead the data analysis. Additional analytic support will be provided by James Slaven, MS, who specializes in hierarchical and longitudinal analyses. The CAMEO nurse care managers will be Carol Kempf, RN and Sharon Weitlauf, RN, both experienced nurse care managers in our previous trials. Jennifer Lydon-Lam, PhD, Samantha Outcalt, PhD, and Shannon Woller, PsyD will deliver the behavioral intervention. Christy Sargent, BA, will serve as project coordinator, Amanda Gerwig, BS as the research assistant, and Tenesha Pennington, MS as the data manager. Our study consultant is Rollin “Mac” Gallagher, MD, MPH who is the VA’s Deputy National Program Director for Pain Management, immediate-past President of the American Academy of Pain Medicine, and an internationally-recognized pain specialist with particular expertise in algorithm-based therapy with co-analgesics, opioid therapy, and integrating pain medicine and primary care.

084 D10d. Data Management

085 Each of the study questionnaires will be programmed into a desktop computer using Microsoft Access. The  
086 research assistant will interview the patient and enter data simultaneously into the Access program. Within the  
087 Access program, algorithms will be created to check for inappropriate or missed data entry. Computer  
088 algorithms will also automatically score the questionnaires and store the summary scales within the same  
089 database, as well as determine the appropriate date for follow-up interviews. These data will be backed up  
090 daily onto a secured server at RVAMC. Participant social security numbers, names, addresses and other  
091 personal information will be restricted to authorized personnel to protect confidentiality. For data analysis and  
092 other uses of the data, this information will be removed from the database and be replaced with a simulated  
093 identification number. This strategy has been used in our previous trials to screen and enroll patients,  
094 accurately complete follow-up assessment, and protect patient privacy. We have experience in setting up data  
095 integrity protocols and data back-up to minimize the risk for lost or inaccurate data.

096 D10e. Data Safety Monitoring Plan

097 The following multi-component Data Safety Monitoring Plan has been used in our VA RR&D-funded trial of  
098 OEF/OIF veterans with chronic musculoskeletal pain and NIMH-funded pain/depression SCAMP trial, all of  
099 which have enrolled veterans. Subjects are monitored during study interventions in the following ways: 1)  
100 Frequent Subject Contacts by Nurse Care Manager (NCM) and Clinical Psychologists. All subjects are closely  
101 followed by scheduled NCM telephone contacts. Response to medications as well as side effects from them  
102 are closely monitored. All interview responses are part of the study database. 2) Weekly Case Management  
103 Review. The NCMs meet weekly with the supervising physicians and a doctor of pharmacy to review the  
104 previous week's subject contacts. Medication management as well as any side effects or problems are  
105 reviewed and discussed. Minutes from these meetings are prepared and stored electronically on a desktop  
106 hard drive with server back-up. The study PI and physician co-investigators are available by pager at all times.  
107 3) Monthly Executive Committee Meetings. The PI and co-investigators meet monthly for Executive  
108 Committee meetings. At these meetings the investigators discuss recruitment, subject safety, protocol  
109 adherence, and any other issues that may arise. Minutes are kept and are circulated to any co-investigators  
110 not able to attend. Subjects will be allowed to withdraw from the trial at any time. If a patient withdraws, we  
111 will determine the reason for withdrawal. Possible reasons will include: 1) death, 2) worsening of comorbid  
112 medical conditions making follow-up impossible, 3) medication side effects, and 4) other. If subjects withdraw,  
113 we will attempt to obtain their permission to complete the remaining outcome assessments. Data will be  
114 analyzed on an intent-to-treat basis. We will establish a local Data Safety Monitoring Board (DSMB) that meets  
115 every 6 months during the study and is notified via email of all deaths and SAEs at the time of local IRB  
116 notification. Members will consist of non-study investigators and will include a pain specialist, a general  
117 internist, a clinical trialist, a nurse, and a biostatistician.

118 The DSMB will monitor the following: (a) subject recruitment, accrual, and retention; (b) patient outcomes and  
119 adverse events; (c) subject safety, privacy, and confidentiality procedures; (d) diversity of subject enrollment  
120 (i.e., gender, race and ethnicity) in terms of concordance with NIH targeted enrollment table for this trial; (e)  
121 data quality and major findings in terms of treatment benefits and risks; (f) results of related studies that impact  
122 subject safety; (g) assessment of scientific reports that might alter the benefit/risk ratio of the study. Analyses  
123 of data will be performed by the study biostatistician but will be independently interpreted by the DSMB (which  
124 will include an independent biostatistician) which can request additional analyses as the DSMB members see  
125 fit. Since this is an effectiveness trial using evidence-based treatments, there are no pre-planned interim  
126 analyses or stopping rules. The DSMB will submit the report of its twice-a-year meetings to the study  
127 investigators who will in turn report the information to the IRB in its continuing review, unless there are items  
128 the DSMB feels should be reported to the IRB immediately.

129  
130 **D11. DISSEMINATION AND IMPLEMENTATION PLAN**

131 The VHA National Pain Management Strategy Coordinating Committee will serve as our primary channel for  
132 disseminating study findings to VA providers, administrators, researchers and policy makers. Findings will be  
133 disseminated to the committee in the form of summary reports and presentations given either in the monthly  
134 conference calls or at their annual face-to-face meeting (or both). The Committee will advise and coordinate  
135 next steps for dissemination, including dissemination to other relevant entities such as VISN and hospital  
136 administrators; local Pain Management Committees; the VISN Pain Points of Contact, the Office of Quality and



137 Performance; and the national working groups related to pain management education, guideline development,  
138 and performance measures. Additionally, a summary of study findings and implications will be posted on the  
139 VHA Pain Management Committee's website in a format readable to veterans. Findings will be disseminated  
140 to our research audiences through scientific presentations and publications, and HSR&D cyber seminars, as  
141 well as through conference calls with the Pain Research Working Group, a subcommittee of the VHA National  
142 Pain Management Strategy Coordinating Committee. We also will seek synergistic opportunities with the Pain  
143 Research, Informatics, Medical comorbidities and Education (PRIME) Center directed by Dr. Robert Kerns (VA  
144 National Program Director for Pain Management).

145 Other resources include a VA national pain management website ([www.va.gov/pain\\_management](http://www.va.gov/pain_management)); a widely  
146 subscribed VA pain list serve; monthly national educational teleconferences targeting providers and  
147 administrators; a network of VISN Pain Points of Contact who hold monthly teleconferences and who serve an  
148 important liaison role between the National Pain Management Committee and facility level pain committees;  
149 and a network of VA and non-VA pain-relevant investigators (the Pain Research Working Group) who hold  
150 twice monthly teleconferences and yearly face-to-face meetings and who, among their goals, work to promote  
151 dissemination of research findings and to influence practice and policy related to pain care. In sum, an  
152 established network of resources is already in place to disseminate study findings. In addition, to the local,  
153 regional, and national pain groups we are already tied into, we will disseminate study findings to the Mental  
154 Health and Substance Use Disorder QUERI groups, the National Serious Mental Illness Treatment Research  
155 and Evaluation Center (SMITREC), the Mental Illness Research, Education, and Clinical Center (MIRECC),  
156 and the HSR&D Center for Information Dissemination and Education Resources (CIDER). Our research group  
157 has disseminated study findings in the VA HSR&D Cyber-seminar forum sponsored by CIDER.

## 158 **D12. POTENTIAL LIMITATIONS OF PROPOSED STUDY**

159 Study design: Our research team thoroughly discussed and debated study design issues. We agreed with the  
160 reviewers that substantial study design changes were necessary to frame as a comparative effectiveness trial  
161 which was adequately powered. Our previous proposal outlined a 3-arm trial (pharmacological vs. behavioral  
162 vs. attention control). However, findings from recent pain trials (SCAMP and APT) demonstrated the  
163 ineffectiveness of usual care, making an attention control of less relevance. A 3-arm trial comparing combined  
164 treatment (PHARM + BEH) vs. PHARM vs. BEH might be warranted pending the results of our head-to-head  
165 comparison of each single-mode intervention. Such a 3-arm study would require more than one VAMC to  
166 enroll an adequate number of subjects and would be best informed by the results of our clinical and cost-  
167 effectiveness findings from the present 2-arm trial.

168 Generalizability: The study sample will be drawn from a single, VA medical center and two VA community  
169 based outpatient clinics in Indiana. As such, the sample may not be representative of all patients with CLBP on  
170 long-term opioids. However, our treatment model could certainly be applied in other VAMCs/CBOCs.

171 Innovation: A core aspect of the CAMEO interventions is nurse care management which has been found to be  
172 effective in other chronic illnesses. While it could be argued that nurse care management is not all that novel,  
173 its use for chronic pain generally and opioid management specifically is innovative and holds promise for  
174 improving opioid management in primary care. Furthermore, testing the comparative effectiveness of different  
175 treatments (pharmacological vs. behavioral) administered by different types of clinicians embedded in VA  
176 primary care (nurses vs. psychologists) is both novel and important.

## 177 **D13. STRENGTHS AND SYNOPSIS OF STUDY**

178 Despite study limitations, the CAMEO trial has a number of strengths, including: (1) *testing the comparative*  
179 *effectiveness of two unique interventions designed to improve the management of CLBP*; (2) management  
180 approaches that challenge existing treatment paradigms for chronic pain care and have the potential to be  
181 applied across multiple VA clinical settings; (3) a high interest study population that has been frustrating to  
182 providers; (4) a randomized clinical trial design; (5) ample statistical power to detect meaningful differences in  
183 our primary outcomes; and (6) an economic evaluation that may provide VA administrators, clinical managers,  
184 and policy makers with data to inform budget decisions to invest in these interventions and make them  
185 routinely available to veterans suffering from chronic low back pain.

186 Should the interventions prove effective in reducing pain intensity and interference with activities our next step  
187 will be: (1) to conduct a post-study, summative evaluation using qualitative methods. The qualitative study will  
188 consist of semi-structured interviews with patients purposefully sampled from each arm of the trial to evaluate

189 which aspects of CAMEO are most effective as perceived by patients. Instead of proposing a nested qualitative  
190 study as part of this application, we will apply for either a separate HSR&D pilot grant or internal grant funding.  
191 This additional funding would allow us to conduct a more rigorous, in-depth qualitative study to complement  
192 CAMEO. We have successfully obtained supplemental funding on two previous occasions and have found this  
193 type of work to be highly informative in elucidating trial results.

194 In sum, PCPs are faced with numerous challenges in treating patients with chronic back pain, including  
195 managing the complexities of opioid therapy while trying to ensure against abuse and addiction. The  
196 interventions being tested in the CAMEO trial have the potential to provide primary care settings with new  
197 treatment models that will help to guide PCPs while at the same time providing much needed relief for veterans  
198 suffering from chronic back pain.
