# Supplementary material for: Effect of Medication Optimization vs Cognitive Behavioral Therapy Among US Veterans With Chronic Low Back Pain Receiving Long-term Opioid Therapy: A Randomized Clinical Trial
Source: PubMed Central journal article supplement (PMC9672973; doi:10.1001/jamanetworkopen.2022.42533), 2022-11-17
Supplement: jamanetwopen-e2242533-s002.pdf [file jamanetwopen-e2242533-s002.pdf]

## Supplementary Online Content

Bushey MA, Slaven JE, Outcalt SD, et al. Effect of medication optimization vs cognitive behavioral therapy among US veterans with chronic low back pain receiving long-term opioid therapy: a randomized clinical trial. *JAMA Netw Open*. 2022;5(11):e2242533.  
doi:10.1001/jamanetworkopen.2022.42533

**eTable 1.** List of Analgesics Assessed on Medical Record Review

**eTable 2.** Prescribed Opioid Morphine Milligram Equivalent (MME) Data

**eTable 3.** Number of Prescribed Analgesics Comparison

This supplementary material has been provided by the authors to give readers additional information about their work.

| <b>eTable 1. List of Analgesics Assessed on Medical Record Review</b> |                                                                                                                       |
|-----------------------------------------------------------------------|-----------------------------------------------------------------------------------------------------------------------|
| Non-Steroidal Anti-Inflammatory Drugs (NSAIDs)                        | Ibuprofen, Naproxen, Etodolac, Diclofenac, Meloxicam, Salsalate, Sulindac, Aspirin ( $\geq 325\text{mg}$ ), Celecoxib |
| Muscle Relaxants                                                      | Cyclobenzaprine, Methocarbamol, Tizanidine                                                                            |
| Antidepressants                                                       | Amitriptyline, Nortriptyline, Duloxetine                                                                              |
| Gabapentinoids                                                        | Gabapentin, Pregabalin                                                                                                |
| Opioids                                                               | Hydrocodone, Oxycodone, Morphine, Methadone, Fentanyl, Tramadol, Codeine                                              |
| Topical                                                               | Capsaicin, Lidocaine, Menthol-salicylate, Diclofenac gel                                                              |
| Supplements                                                           | Glucosamine, Hyaluronic acid (oral)                                                                                   |
| Other                                                                 | Acetaminophen                                                                                                         |

| <b>eTable 2. Prescribed Opioid Morphine Milligram Equivalent (MME) Data</b> |           |      |      |      |       |           |      |      |      |      |
|-----------------------------------------------------------------------------|-----------|------|------|------|-------|-----------|------|------|------|------|
| Timepoint                                                                   | MED Group |      |      |      |       | CBT Group |      |      |      |      |
|                                                                             | BL        | 3mo  | 6mo  | 9mo  | 12mo  | BL        | 3mo  | 6mo  | 9mo  | 12mo |
| Mean                                                                        | 68.6      | 64.5 | 61.2 | 59.4 | 54.1  | 76.2      | 70.8 | 72.7 | 70.9 | 66.7 |
| SD                                                                          | 81.0      | 73.7 | 75.2 | 77.1 | 73.3  | 96.5      | 94.7 | 96.8 | 97.6 | 96.1 |
| Median                                                                      | 40        | 40   | 40   | 30   | 30    | 45        | 40   | 40   | 40   | 40   |
| Mode                                                                        | 40        | 40   | 40   | 30   | 0     | 30        | 30   | 30   | 30   | 30   |
| Max                                                                         | 450       | 450  | 450  | 480  | 450   | 900       | 900  | 900  | 900  | 900  |
| Min                                                                         | 8         | 0    | 0    | 0    | 0     | 10        | 0    | 0    | 0    | 0    |
| Q1                                                                          | 23        | 20   | 20   | 20   | 15    | 30        | 30   | 30   | 30   | 20   |
| Q3                                                                          | 69        | 71   | 71   | 69   | 60    | 90        | 90   | 90   | 90   | 90   |
| Skew                                                                        | 2.7       | 2.6  | 2.8  | 2.9  | 2.9   | 5.4       | 5.7  | 5.4  | 5.3  | 5.5  |
| Kurtosis                                                                    | 7.5       | 8.0  | 8.8  | 9.8  | 9.7   | 41.2      | 45.8 | 41.5 | 40.4 | 43.8 |
| <sup>a</sup> BL compare                                                     | n/a       | .67  | .20  | .07  | 0.006 | n/a       | .38  | .51  | .25  | 0.06 |
| <sup>b</sup> Group compare 1                                                | 0.11      | .30  | .04  | .06  | 0.06  | 0.11      | .30  | .04  | .06  | 0.06 |
| <sup>c</sup> Group compare 2                                                | 0.48      | 0.55 | 0.28 | 0.29 | 0.24  | 0.48      | 0.55 | 0.28 | 0.29 | 0.24 |

<sup>a</sup> BL compare = P-value of within group comparison to baseline values by Mann-Whitney U test.  
<sup>b</sup> Group compare 1 = P-value of between group comparison at each timepoint by Mann-Whitney U test.  
<sup>c</sup> Group compare 2 = P-value of between group comparison at each timepoint by Student's T-Test.

| <b>eTable 3. Number of Prescribed Analgesics Comparison</b>                                                                                                                                                                                                                                                                        |                  |            |            |            |             |                  |            |            |            |             |
|------------------------------------------------------------------------------------------------------------------------------------------------------------------------------------------------------------------------------------------------------------------------------------------------------------------------------------|------------------|------------|------------|------------|-------------|------------------|------------|------------|------------|-------------|
|                                                                                                                                                                                                                                                                                                                                    | <b>MED Group</b> |            |            |            |             | <b>CBT Group</b> |            |            |            |             |
| <b>Timepoint</b>                                                                                                                                                                                                                                                                                                                   | <b>BL</b>        | <b>3mo</b> | <b>6mo</b> | <b>9mo</b> | <b>12mo</b> | <b>BL</b>        | <b>3mo</b> | <b>6mo</b> | <b>9mo</b> | <b>12mo</b> |
| Mean                                                                                                                                                                                                                                                                                                                               | 0.3              | 2.2        | 1.7        | 1.4        | 1.3         | 0.3              | 0.8        | 0.7        | 0.7        | 0.8         |
| SD                                                                                                                                                                                                                                                                                                                                 | 0.6              | 1.3        | 1.3        | 1.1        | 1.1         | 0.6              | 1.0        | 0.8        | 0.9        | 1.0         |
| Median                                                                                                                                                                                                                                                                                                                             | 0                | 2          | 2          | 1          | 1           | 0                | 0          | 1          | 0          | 1           |
| Mode                                                                                                                                                                                                                                                                                                                               | 0                | 3          | 2          | 1          | 1           | 0                | 0          | 0          | 0          | 0           |
| Max                                                                                                                                                                                                                                                                                                                                | 3                | 6          | 6          | 6          | 4           | 3                | 4          | 3          | 3          | 5           |
| Min                                                                                                                                                                                                                                                                                                                                | 0                | 0          | 0          | 0          | 0           | 0                | 0          | 0          | 0          | 0           |
| Q1                                                                                                                                                                                                                                                                                                                                 | 0                | 1          | 1          | 1          | 0           | 0                | 0          | 0          | 0          | 0           |
| Q3                                                                                                                                                                                                                                                                                                                                 | 1                | 3          | 3          | 2          | 2           | 1                | 1          | 1          | 1          | 1           |
| Skew                                                                                                                                                                                                                                                                                                                               | 1.8              | 0.3        | 0.5        | 0.7        | 0.5         | 2.0              | 1.2        | 1.0        | 1.1        | 1.5         |
| Kurtosis                                                                                                                                                                                                                                                                                                                           | 3.0              | -0.2       | 0.0        | 0.8        | -0.4        | 3.7              | 0.9        | 0.4        | 0.5        | 2.8         |
| <sup>a</sup> BL compare                                                                                                                                                                                                                                                                                                            | n/a              | < .001     | < .001     | < .001     | < .001      | n/a              | < .001     | < .001     | < .001     | < .001      |
| <sup>b</sup> Group compare 1                                                                                                                                                                                                                                                                                                       | 0.76             | < .001     | < .001     | < .001     | < .001      | 0.76             | < .001     | < .001     | < .001     | < .001      |
| <sup>c</sup> Group compare 2                                                                                                                                                                                                                                                                                                       | 0.71             | < .001     | < .001     | < .001     | < .001      | 0.71             | < .001     | < .001     | < .001     | < .001      |
| <sup>a</sup> BL compare = P-value of within group comparison to baseline values by Mann-Whitney U test.<br><sup>b</sup> Group compare = P-value of between group comparison at each timepoint by Mann-Whitney U test.<br><sup>c</sup> Group compare 2 = P-value of between group comparison at each timepoint by Student's T-Test. |                  |            |            |            |             |                  |            |            |            |             |
