# Supplementary material for: Effect of Medication Optimization vs Cognitive Behavioral Therapy Among US Veterans With Chronic Low Back Pain Receiving Long-term Opioid Therapy: A Randomized Clinical Trial
Source: PubMed Central journal article supplement (PMC9672973; doi:10.1001/jamanetworkopen.2022.42533), 2022-11-17
Supplement: jamanetwopen-e2242533-s003.pdf [file jamanetwopen-e2242533-s003.pdf]

## Data Sharing Statement

Bushey. Effect of Medication Optimization vs Cognitive Behavioral Therapy Among US Veterans With Chronic Low Back Pain Receiving Long-term Opioid Therapy. *JAMA Network Open*. Published November 17, 2022. doi:10.1001/jamanetworkopen.2022.42533

### Data

**Data available:** No
